# Supplementary material for: The Extracellular Bone Marrow Microenvironment—A Proteomic Comparison of Constitutive Protein Release by In Vitro Cultured Osteoblasts and Mesenchymal Stem Cells
Source: PubMed Central journal article supplement (PMC7795818; doi:10.3390/cancers13010062), 2020-12-28
Supplement: cancers-13-00062-s001.pdf [file cancers-13-00062-s001.pdf]

## **The extracellular bone marrow microenvironment – a proteomic comparison of constitutive protein release by *in vitro* cultured osteoblasts and mesenchymal stem cells**

**Elise Aasebø<sup>1</sup>, Even Birkeland<sup>2</sup>, Frode Selheim<sup>2</sup>, Frode Berven<sup>2</sup>, Annette K. Brenner<sup>1</sup> and Øystein Bruserud<sup>1,3,\*</sup>**

<sup>1</sup> Department of Clinical Science, University of Bergen, Bergen, Norway; [elise.aasebo@uib.no](mailto:elise.aasebo@uib.no), [annette.brenner@uib.no](mailto:annette.brenner@uib.no), [oystein.bruserud@uib.no](mailto:oystein.bruserud@uib.no)

<sup>2</sup> The Proteomics Facility of the University of Bergen (PROBE), University of Bergen, Bergen, Norway; [even.birkeland@uib.no](mailto:even.birkeland@uib.no), [frode.selheim@uib.no](mailto:frode.selheim@uib.no), [frode.berven@uib.no](mailto:frode.berven@uib.no)

<sup>3</sup> Department of Medicine, Haukeland University Hospital, Bergen, Norway; [oystein.bruserud@helse-bergen.no](mailto:oystein.bruserud@helse-bergen.no)

**Table S1.** Proteins released by *in vitro* cultured MSCs and/or osteoblasts; a summary showing important groups of proteins. Only structural groups/main groups including at least five members are shown.

**EXTRACELLULAR MATRIX (*n*=34)**

**Collagens (*n*=22)**

|          |                                                                     |
|----------|---------------------------------------------------------------------|
| COL1A1   | Collagen alpha-1(I) chain                                           |
| COL1A2   | Collagen alpha-2(I) chain                                           |
| COL2A1   | Collagen alpha-1(II) chain;Collagen alpha-1(II) chain;Chondrocalcin |
| COL3A1   | Collagen alpha-1(III) chain                                         |
| COL4A1   | Collagen alpha-1(IV) chain;Arresten                                 |
| COL4A2   | Collagen alpha-2(IV) chain;Canstatin                                |
| COL5A1   | Collagen alpha-1(V) chain                                           |
| COL5A2   | Collagen alpha-2(V) chain                                           |
| COL5A3   | Collagen alpha-3(V) chain                                           |
| COL6A1   | Collagen alpha-1(VI) chain                                          |
| COL6A2   | Collagen alpha-2(VI) chain                                          |
| COL6A2   | Collagen alpha-2(VI) chain                                          |
| COL6A3   | Collagen alpha-3(VI) chain                                          |
| COL7A1   | Collagen alpha-1(VII) chain                                         |
| COL8A1   | Collagen alpha-1(VIII) chain;Vastatin                               |
| COL10A1  | Collagen alpha-1(X) chain                                           |
| COL11A1  | Collagen alpha-1(XI) chain                                          |
| COL12A1  | Collagen alpha-1(XII) chain                                         |
| COL14A1  | Collagen alpha-1(XIV) chain                                         |
| COL16A1  | Collagen alpha-1(XVI) chain                                         |
| COL18A1  | Collagen alpha-1(XVIII) chain;Endostatin                            |
| COLGALT1 | Procollagen galactosyltransferase 1                                 |

**Fibulin, fibrillin (*n*=6)**

|       |             |
|-------|-------------|
| FBLN1 | Fibulin-1   |
| FBLN1 | Fibulin-1   |
| FBLN2 | Fibulin-2   |
| FBLN5 | Fibulin-5   |
| FBN1  | Fibrillin-1 |
| FBN2  | Fibrillin-2 |

**Laminin (*n*=6)**

|       |                         |
|-------|-------------------------|
| LAMA1 | Laminin subunit alpha-1 |
| LAMA2 | Laminin subunit alpha-2 |
| LAMA4 | Laminin subunit alpha-4 |
| LAMB1 | Laminin subunit beta-1  |
| LAMB2 | Laminin subunit beta-2  |
| LAMC1 | Laminin subunit gamma-1 |

**COMPLEMENT FACTORS (*n*=11)**

|       |                             |
|-------|-----------------------------|
| C1QBP | Complement component 1 Q    |
| C1R   | Complement C1r subcomponent |
| C1S   | Complement C1s subcomponent |
| C2    | Complement C2               |

|     |                     |
|-----|---------------------|
| C3  | Complement C3       |
| C4A | Complement C4-A     |
| C4B | Complement C4-B     |
| CFB | Complement factor B |
| CFD | Complement factor D |
| CFH | Complement factor H |
| CFI | Complement factor I |

### **PROTEASES AND PROTEASE INHIBITORS (*n=26*)**

#### **Cathepsin proteases (*n=7*)**

|      |              |
|------|--------------|
| CTSD | Cathepsin D  |
| CTSF | Cathepsin F  |
| CTSG | Cathepsin G  |
| CTSK | Cathepsin K  |
| CTSL | Cathepsin L1 |
| CTSS | Cathepsin S  |
| CTSZ | Cathepsin Z  |

#### **ADAM proteases (*n=7*)**

|          |                                                                  |
|----------|------------------------------------------------------------------|
| ADAM9    | Disintegrin and metalloproteinase domain-containing protein 9    |
| ADAM10   | Disintegrin and metalloproteinase domain-containing protein 10   |
| ADAM19   | Disintegrin and metalloproteinase domain-containing protein 19   |
| ADAMTS1  | A disintegrin and metalloproteinase with thrombospondin motifs 1 |
| ADAMTS2  | A disintegrin and metalloproteinase with thrombospondin motifs 2 |
| ADAMTS4  | A disintegrin and metalloproteinase with thrombospondin motifs 4 |
| ADAMTSL1 | ADAMTS-like protein 1                                            |

#### **Serpins (protease inhibitors, *n=12*)**

|           |                                   |
|-----------|-----------------------------------|
| SERPINA9  | Serpin A9                         |
| SERPINB1  | Leukocyte elastase inhibitor      |
| SERPINB10 | Serpin B10                        |
| SERPINB2  | Plasminogen activator inhibitor 2 |
| SERPINB6  | Serpin B6                         |
| SERPINB7  | Serpin B7                         |
| SERPINB8  | Serpin B8                         |
| SERPINE1  | Plasminogen activator inhibitor 1 |
| SERPINE2  | Glia-derived nexin                |
| SERPINF1  | Pigment epithelium-derived factor |
| SERPING1  | Plasma protease C1 inhibitor      |
| SERPINH1  | Serpin H1                         |

### **CELL SURFACE MOLECULES (*n=13*)**

#### **Cadherins (*n=3*)**

|       |             |
|-------|-------------|
| CDH11 | Cadherin-11 |
| CDH13 | Cadherin-13 |
| CDH2  | Cadherin-2  |

#### **HLA molecules (*n=4*)**

|       |                                        |
|-------|----------------------------------------|
| HLA-A | HLA class I histocompatibility antigen |
|-------|----------------------------------------|

|         |                                                         |
|---------|---------------------------------------------------------|
| HLA-B   | HLA class I histocompatibility antigen, alpha chain     |
| HLA-C   | HLA class I histocompatibility antigen, alpha chain     |
| HLA-DRA | HLA class II histocompatibility antigen, DR alpha chain |

**Integrins (*n*=5)**

|        |                              |
|--------|------------------------------|
| ITGA5  | Integrin alpha-5             |
| ITGAM  | Integrin alpha-M             |
| ITGB1  | Integrin beta-1              |
| ITGB2  | Integrin beta-2              |
| ITGBL1 | Integrin beta-like protein 1 |

**INSULIN-LIKE GROWTH FACTOR (*n*=9)**

|        |                                                                        |
|--------|------------------------------------------------------------------------|
| IGF2   | Insulin-like growth factor II                                          |
| IGF2R  | Cation-independent mannose-6-phosphate receptor                        |
| IGFALS | Insulin-like growth factor-binding protein complex acid labile subunit |
| IGFBP2 | Insulin-like growth factor-binding protein 2                           |
| IGFBP3 | Insulin-like growth factor-binding protein 3                           |
| IGFBP4 | Insulin-like growth factor-binding protein 4                           |
| IGFBP5 | Insulin-like growth factor-binding protein 5                           |
| IGFBP6 | Insulin-like growth factor-binding protein 6                           |
| IGFBP7 | Insulin-like growth factor-binding protein 7                           |

**GTPases, GTP BINDING PROTEINS, RAS-RELATED PROTEINS (*n*=21)**

**GTPases (*n*=5)**

|          |                                          |
|----------|------------------------------------------|
| ARHGAP1  | Rho GTPase-activating protein 1          |
| ARHGAP30 | Rho GTPase-activating protein 30         |
| ARHGDI1  | Rho GDP-dissociation inhibitor 1         |
| ARHGDI2  | Rho GDP-dissociation inhibitor 2         |
| ARHGEF1  | Rho guanine nucleotide exchange factor 1 |

**Septins (GTP binding proteins, *n*=5)**

|        |           |
|--------|-----------|
| SEPT2  | Septin-2  |
| SEPT6  | Septin-6  |
| SEPT7  | Septin-7  |
| SEPT9  | Septin-9  |
| SEPT11 | Septin-11 |

**RAS-related proteins (*n*=11)**

|        |                             |
|--------|-----------------------------|
| RAB14  | Ras-related protein Rab-14  |
| RAB1A  | Ras-related protein Rab-1A  |
| RAB1B  | Ras-related protein Rab-1B  |
| RAB2A  | Ras-related protein Rab-2A  |
| RAB5C  | Ras-related protein Rab-5C  |
| RAB6A  | Ras-related protein Rab-6A  |
| RAB7A  | Ras-related protein Rab-7A  |
| RAB8B  | Ras-related protein Rab-8B  |
| RAB10  | Ras-related protein Rab-10  |
| RAB11A | Ras-related protein Rab-11A |
| RAB11B | Ras-related protein Rab-11B |

## PROTEIN SYNTHESIS, STABILIZATION AND MODULATION (*n=156*)

### RNA binding proteins (*n=5*)

|             |                                         |
|-------------|-----------------------------------------|
| RBM3        | RNA-binding protein 3                   |
| RBM8A       | RNA-binding protein 8A                  |
| RBM25       | RNA-binding protein 25                  |
| RBM42       | RNA-binding protein 42                  |
| RBMX;RBMXL1 | RNA-binding motif protein, X chromosome |

### Splicing factors (*n=12*)

|             |                                                                                |
|-------------|--------------------------------------------------------------------------------|
| SF3A1       | Splicing factor 3A subunit 1                                                   |
| SF3A3       | Splicing factor 3A subunit 3                                                   |
| SF3B1       | Splicing factor 3B subunit 1                                                   |
| SF3B2       | Splicing factor 3B subunit 2                                                   |
| SF3B3       | Splicing factor 3B subunit 3                                                   |
| SF3B4       | Splicing factor 3B subunit 4                                                   |
| SF3B5       | Splicing factor 3B subunit 5                                                   |
| SFPQ        | Splicing factor, proline- and glutamine-rich                                   |
| SRSF1       | Serine/arginine-rich splicing factor 1                                         |
| SRSF2       | Serine/arginine-rich splicing factor 2                                         |
| SRSF6;SRSF4 | Serine/arginine-rich splicing factor 6; Serine/arginine-rich splicing factor 4 |
| SRSF7       | Serine/arginine-rich splicing factor 7                                         |

### Ribosomal proteins (*n=44*)

|               |                                 |
|---------------|---------------------------------|
| RPL3          | 60S ribosomal protein L3        |
| RPL4          | 60S ribosomal protein L4        |
| RPL5          | 60S ribosomal protein L5        |
| RPL6          | 60S ribosomal protein L6        |
| RPL7A         | 60S ribosomal protein L7a       |
| RPL9          | 60S ribosomal protein L9        |
| RPL10A        | 60S ribosomal protein L10a      |
| RPL12         | 60S ribosomal protein L12       |
| RPL13         | 60S ribosomal protein L13       |
| RPL13A        | 60S ribosomal protein L13a      |
| RPL15         | 60S ribosomal protein L15       |
| RPL17         | 60S ribosomal protein L17       |
| RPL18         | 60S ribosomal protein L18       |
| RPL23         | 60S ribosomal protein L23       |
| RPL23A        | 60S ribosomal protein L23a      |
| RPL29         | 60S ribosomal protein L29       |
| RPL30         | 60S ribosomal protein L30       |
| RPLP0;RPLP0P6 | 60S acidic ribosomal protein P0 |
| RPLP1         | 60S acidic ribosomal protein P1 |
| RPLP2         | 60S acidic ribosomal protein P2 |
| RPS2          | 40S ribosomal protein S2        |
| RPS3          | 40S ribosomal protein S3        |
| RPS11         | 40S ribosomal protein S11       |
| RPS12         | 40S ribosomal protein S12       |

|                |                                     |
|----------------|-------------------------------------|
| RPS13          | 40S ribosomal protein S13           |
| RPS14          | 40S ribosomal protein S14           |
| RPS15          | 40S ribosomal protein S15           |
| RPS15A         | 40S ribosomal protein S15a          |
| RPS17          | 40S ribosomal protein S17           |
| RPS18          | 40S ribosomal protein S18           |
| RPS19          | 40S ribosomal protein S19           |
| RPS20          | 40S ribosomal protein S20           |
| RPS21          | 40S ribosomal protein S21           |
| RPS23          | 40S ribosomal protein S23           |
| RPS26;RPS26P11 | 40S ribosomal protein S26           |
| RPS28          | 40S ribosomal protein S28           |
| RPS3A          | 40S ribosomal protein S3a           |
| RPS4X;RPS4Y1   | 40S ribosomal protein S4, X isoform |
| RPS5           | 40S ribosomal protein S5            |
| RPS6           | 40S ribosomal protein S6            |
| RPS7           | 40S ribosomal protein S7            |
| RPS8           | 40S ribosomal protein S8            |
| RPSA           | 40S ribosomal protein SA            |
| RRBP1          | Ribosome-binding protein 1          |

**Translation; initiation and elongation ( $n=21$ )**

|                        |                                                      |
|------------------------|------------------------------------------------------|
| EIF1                   | Eukaryotic translation initiation factor 1           |
| EIF2S1                 | Eukaryotic translation initiation factor 2 subunit 1 |
| EIF2S2                 | Eukaryotic translation initiation factor 2 subunit 2 |
| EIF2S3;EIF2S3L         | Eukaryotic translation initiation factor 2 subunit 3 |
| EIF3C;EIF3CL           | Eukaryotic translation initiation factor 3 subunit C |
| EIF3G                  | Eukaryotic translation initiation factor 3 subunit G |
| EIF3H                  | Eukaryotic translation initiation factor 3 subunit H |
| EIF3I                  | Eukaryotic translation initiation factor 3 subunit I |
| EIF3J                  | Eukaryotic translation initiation factor 3 subunit J |
| EIF3M                  | Eukaryotic translation initiation factor 3 subunit M |
| EIF4A1;EIF4A2          | Eukaryotic initiation factor 4A-I                    |
| EIF4A3                 | Eukaryotic initiation factor 4A-III                  |
| EIF4B                  | Eukaryotic translation initiation factor 4B          |
| EIF4G1                 | Eukaryotic translation initiation factor 4 gamma 1   |
| EIF5A;EIF5AL1          | Eukaryotic translation initiation factor 5A-1        |
| EIF6                   | Eukaryotic translation initiation factor 6           |
| EEF1A1;EEF1A1P5;EEF1A2 | Elongation factor 1-alpha 1                          |
| EEF1B2                 | Elongation factor 1-beta                             |
| EEF1E1                 | Eukaryotic translation elongation factor 1 epsilon-1 |
| EEF1G                  | Elongation factor 1-gamma                            |
| EEF2                   | Elongation factor 2                                  |

**Chaperones: T complex proteins ( $n=7$ )**

|      |                                     |
|------|-------------------------------------|
| CCT2 | T-complex protein 1 subunit beta    |
| CCT3 | T-complex protein 1 subunit gamma   |
| CCT4 | T-complex protein 1 subunit delta   |
| CCT5 | T-complex protein 1 subunit epsilon |

|                                        |                                                  |
|----------------------------------------|--------------------------------------------------|
| CCT6A                                  | T-complex protein 1 subunit zeta                 |
| CCT7                                   | T-complex protein 1 subunit eta                  |
| CCT8                                   | T-complex protein 1 subunit theta                |
| <b>Heat shock protein (n=17)</b>       |                                                  |
| HSBP1                                  | Heat shock factor-binding protein 1              |
| HSP90AA1                               | Heat shock protein HSP 90-alpha                  |
| HSP90AA4P                              | Putative heat shock protein HSP 90-alpha A4      |
| HSP90AB1                               | Heat shock protein HSP 90-beta                   |
| HSP90AB2P                              | Putative heat shock protein HSP 90-beta 2        |
| HSP90AB4P                              | Putative heat shock protein HSP 90-beta 4        |
| HSP90B1                                | Endoplasmic                                      |
| HSPA1B;HSPA1A                          | Heat shock 70 kDa protein 1B;                    |
| HSPA4                                  | Heat shock 70 kDa protein 4                      |
| HSPA5                                  | 78 kDa glucose-regulated protein                 |
| HSPA6;HSPA7                            | Heat shock 70 kDa protein 6                      |
| HSPA8                                  | Heat shock cognate 71 kDa protein                |
| HSPA9                                  | Stress-70 protein, mitochondrial                 |
| HSPB1                                  | Heat shock protein beta-1                        |
| HSPD1                                  | 60 kDa heat shock protein, mitochondrial         |
| HSPE1                                  | 10 kDa heat shock protein, mitochondrial         |
| HSPH1                                  | Heat shock protein 105 kDa                       |
| <b>Peptidyl-prolyl cis-trans (n=6)</b> |                                                  |
| FKBP1A                                 | Peptidyl-prolyl cis-trans isomerase FKBP1A       |
| FKBP3                                  | Peptidyl-prolyl cis-trans isomerase FKBP3        |
| FKBP4                                  | Peptidyl-prolyl cis-trans isomerase FKBP4        |
| FKBP5                                  | Peptidyl-prolyl cis-trans isomerase FKBP5        |
| FKBP9                                  | Peptidyl-prolyl cis-trans isomerase FKBP9        |
| FKBP10                                 | Peptidyl-prolyl cis-trans isomerase FKBP10       |
| <b>Glycosylation (n=4)</b>             |                                                  |
| GALNT2                                 | Polypeptide N-acetylgalactosaminyltransferase 2  |
| GALNT5                                 | Polypeptide N-acetylgalactosaminyltransferase 5  |
| GALNT6                                 | Polypeptide N-acetylgalactosaminyltransferase 6  |
| GALNT16                                | Polypeptide N-acetylgalactosaminyltransferase 16 |
| <b>Ubiquitination (n=12)</b>           |                                                  |
| UBE2K                                  | Ubiquitin-conjugating enzyme E2 K                |
| UBE2L3                                 | Ubiquitin-conjugating enzyme E2 L3               |
| UBE2N                                  | Ubiquitin-conjugating enzyme E2 N                |
| UBE2V1                                 | Ubiquitin-conjugating enzyme E2 variant 1        |
| UBQLN1;UBQLN2                          | Ubiquilin-1;Ubiquilin-2                          |
| UCHL1                                  | Ubiquitin carboxyl-terminal hydrolase isozyme L1 |
| UCHL3                                  | Ubiquitin carboxyl-terminal hydrolase isozyme L3 |
| UFM1                                   | Ubiquitin-fold modifier 1                        |
| USP14                                  | Ubiquitin carboxyl-terminal hydrolase 14         |
| USP15                                  | Ubiquitin carboxyl-terminal hydrolase 15         |
| USP48                                  | Ubiquitin carboxyl-terminal hydrolase 48         |
| USP5                                   | Ubiquitin carboxyl-terminal hydrolase 5          |

**Proteasomal proteins (n=20)**

|        |                                        |
|--------|----------------------------------------|
| PSMA1  | Proteasome subunit alpha type-1        |
| PSMA2  | Proteasome subunit alpha type-2        |
| PSMA3  | Proteasome subunit alpha type-3        |
| PSMA4  | Proteasome subunit alpha type-4        |
| PSMA5  | Proteasome subunit alpha type-5        |
| PSMA6  | Proteasome subunit alpha type-6        |
| PSMA7  | Proteasome subunit alpha type-7        |
| PSMB1  | Proteasome subunit beta type-1         |
| PSMB2  | Proteasome subunit beta type-2         |
| PSMB3  | Proteasome subunit beta type-3         |
| PSMB4  | Proteasome subunit beta type-4         |
| PSMB5  | Proteasome subunit beta type-5         |
| PSMB6  | Proteasome subunit beta type-6         |
| PSMB7  | Proteasome subunit beta type-7         |
| PSMB8  | Proteasome subunit beta type-8         |
| PSMB9  | Proteasome subunit beta type-9         |
| PSMB10 | Proteasome subunit beta type-10        |
| PSME1  | Proteasome activator complex subunit 1 |
| PSME2  | Proteasome activator complex subunit 2 |
| PSME3  | Proteasome activator complex subunit 3 |

**Protein phosphorylation (n=8)**

|                |                                                                                   |
|----------------|-----------------------------------------------------------------------------------|
| PPP1CA;PPP1CC  | Serine/threonine-protein phosphatase PP1-alpha catalytic subunit;                 |
| PPP1R14B       | Protein phosphatase 1 regulatory subunit 14B                                      |
| PPP1R18        | Phostensin                                                                        |
| PPP1R7         | Protein phosphatase 1 regulatory subunit 7                                        |
| PPP2CA; PPP2CB | Serine/threonine-protein phosphatase 2A catalytic subunit alpha isoform           |
| PPP2R1A        | Serine/threonine-protein phosphatase 2A 65 kDa regulatory subunit A alpha isoform |
| PPP3CA         | Serine/threonine-protein phosphatase 2B catalytic subunit alpha isoform           |
| PPP3R1         | Calcineurin subunit B type 1                                                      |

**CYTOSKELETON (n=22)****Actin and actin-interacting proteins (n=19)**

|        |                                         |
|--------|-----------------------------------------|
| ACTB   | Actin, cytoplasmic 1                    |
| ACTBL2 | Beta-actin-like protein 2               |
| ACTC1  | Actin, alpha cardiac muscle 1           |
| ACTG1  | Actin, cytoplasmic 2                    |
| ACTL6A | Actin-like protein 6A                   |
| ACTN1  | Alpha-actinin-1                         |
| ACTN4  | Alpha-actinin-4                         |
| ACTR1A | Alpha-centractin                        |
| ACTR2  | Actin-related protein 2                 |
| ACTR3  | Actin-related protein 3                 |
| CAPZA1 | F-actin-capping protein subunit alpha-1 |
| CAPZA2 | F-actin-capping protein subunit alpha-2 |



|        |                                              |
|--------|----------------------------------------------|
| CAPZB  | F-actin-capping protein subunit beta         |
| ARPC1A | Actin-related protein 2/3 complex subunit 1A |
| ARPC1B | Actin-related protein 2/3 complex subunit 1B |
| ARPC2  | Actin-related protein 2/3 complex subunit 2  |
| ARPC3  | Actin-related protein 2/3 complex subunit 3  |
| ARPC4  | Actin-related protein 2/3 complex subunit 4  |
| ARPC5  | Actin-related protein 2/3 complex subunit 5  |

#### **Tropomyosin (*n*=3)**

|      |                           |
|------|---------------------------|
| TPM1 | Tropomyosin alpha-1 chain |
| TPM3 | Tropomyosin alpha-3 chain |
| TPM4 | Tropomyosin alpha-4 chain |

#### **ORGANELLAR FUNCTIONS - V-ATPases (*n*=9)**

|          |                                               |
|----------|-----------------------------------------------|
| ATP5A1   | ATP synthase subunit alpha, mitochondrial     |
| ATP5B    | ATP synthase subunit beta, mitochondrial      |
| ATP5D    | ATP synthase subunit delta, mitochondrial     |
| ATP5J    | ATP synthase-coupling factor 6, mitochondrial |
| ATP6AP1  | V-type proton ATPase subunit S1               |
| ATP6AP2  | Renin receptor                                |
| ATP6V1A  | V-type proton ATPase catalytic subunit A      |
| ATP6V1B2 | V-type proton ATPase subunit B                |
| ATP6V1E1 | V-type proton ATPase subunit E 1              |

#### **NUCLEAR PROTEINS (*n*=49)**

##### **Histones (*n*=18)**

|             |                                                   |
|-------------|---------------------------------------------------|
| H1F0        | Histone H1.0;Histone H1.0, N-terminally processed |
| H2AFV;H2AFZ | Histone H2A.V;Histone H2A.Z                       |
| H2AFY       | Core histone macro-H2A.1                          |
| H3F3A       | Histone H3.3                                      |
| HIST1H1B    | Histone H1.5                                      |
| HIST1H1C    | Histone H1.2                                      |
| HIST1H1D    | Histone H1.3                                      |
| HIST1H1E    | Histone H1.4                                      |
| HIST1H2AC   | Histone H2A type 1-C;Histone H2A type 3           |
| HIST1H2AJ   | Histone H2A type 1-J                              |
| HIST1H2BM   | Histone H2B type 1-M                              |
| HIST1H3A    | Histone H3.1;Histone H3.1t;Histone H3.3C          |
| HIST1H4A    | Histone H4                                        |
| HIST2H2AC   | Histone H2A type 2-C;Histone H2A type 2-A         |
| HIST2H2BE   | Histone H2B type 2-E;Histone H2B type 1-B         |
| HIST2H3A    | Histone H3.2                                      |
| RBBP4       | Histone-binding protein RBBP4                     |
| RBBP7       | Histone-binding protein RBBP7                     |

##### **Non-histone chromatin proteins (*n*=20)**

|         |                                            |
|---------|--------------------------------------------|
| HMGN1   | Non-histone chromosomal protein HMG-14     |
| HMGN2   | Non-histone chromosomal protein HMG-17     |
| HNRNPA0 | Heterogeneous nuclear ribonucleoprotein A0 |

|                   |                                                          |
|-------------------|----------------------------------------------------------|
| HNRNPA1;HNRNPA1L2 | Heterogeneous nuclear ribonucleoprotein A1               |
| HNRNPA2B1         | Heterogeneous nuclear ribonucleoproteins A2/B1           |
| HNRNPA3           | Heterogeneous nuclear ribonucleoprotein A3               |
| HNRNPAB           | Heterogeneous nuclear ribonucleoprotein A/B              |
| HNRNPC            | Heterogeneous nuclear ribonucleoproteins C1/C2           |
| HNRNPD            | Heterogeneous nuclear ribonucleoprotein D0               |
| HNRNPDL           | Heterogeneous nuclear ribonucleoprotein D-like           |
| HNRNPF            | Heterogeneous nuclear ribonucleoprotein F                |
| HNRNPH1           | Heterogeneous nuclear ribonucleoprotein H                |
| HNRNPH3           | Heterogeneous nuclear ribonucleoprotein H3               |
| HNRNPK            | Heterogeneous nuclear ribonucleoprotein K                |
| HNRNPL            | Heterogeneous nuclear ribonucleoprotein L                |
| HNRNPM            | Heterogeneous nuclear ribonucleoprotein M                |
| HNRNPR            | Heterogeneous nuclear ribonucleoprotein R                |
| HNRNPU            | Heterogeneous nuclear ribonucleoprotein U                |
| HNRNPUL2          | Heterogeneous nuclear ribonucleoprotein U-like protein 2 |
| HP1BP3            | Heterochromatin protein 1-binding protein 3              |

#### **Nuclear proteins (*n=11*)**

|          |                                                     |
|----------|-----------------------------------------------------|
| SNRNP200 | U5 small nuclear ribonucleoprotein 200 kDa helicase |
| SNRPA    | U1 small nuclear ribonucleoprotein A                |
| SNRPA1   | U2 small nuclear ribonucleoprotein A                |
| SNRPB2   | U2 small nuclear ribonucleoprotein B                |
| SNRPD1   | Small nuclear ribonucleoprotein Sm D1               |
| SNRPD2   | Small nuclear ribonucleoprotein Sm D2               |
| SNRPD3   | Small nuclear ribonucleoprotein Sm D3               |
| SNRPE    | Small nuclear ribonucleoprotein E                   |
| SNRPF    | Small nuclear ribonucleoprotein F                   |
| SNRPG    | Small nuclear ribonucleoprotein G                   |
| SRRM1    | Serine/arginine repetitive matrix protein 1         |

#### **INTRACELLULAR TRANSPORT (*n=14*)**

##### **14-3-3 proteins (*n=6*)**

|       |                                                     |
|-------|-----------------------------------------------------|
| YWHAB | 14-3-3 protein beta/alpha;14-3-3 protein beta/alpha |
| YWHAE | 14-3-3 protein epsilon                              |
| YWHAG | 14-3-3 protein gamma;14-3-3 protein gamma           |
| YWHAH | 14-3-3 protein eta                                  |
| YWHAQ | 14-3-3 protein theta                                |
| YWHAZ | 14-3-3 protein zeta/delta                           |

##### **SLC transporter (*n=8*)**

|                 |                                                                     |
|-----------------|---------------------------------------------------------------------|
| SLC1A5          | Neutral amino acid transporter B(0)                                 |
| SLC25A5         | ADP/ATP translocase 2;ADP/ATP translocase 2, N-terminally processed |
| SLC25A6;SLC25A4 | ADP/ATP translocase 3                                               |
| SLC2A1          | Solute carrier family 2, facilitated glucose transporter member 1   |
| SLC38A2         | Sodium-coupled neutral amino acid transporter 2                     |
| SLC3A2          | 4F2 cell-surface antigen heavy chain                                |
| SLC4A1          | Band 3 anion transport protein                                      |

SLC9A3R1

Na(+)/H(+) exchange regulatory cofactor NHE-RF1

**METABOLISM, REDOX BALANCE (*n=10*)**

**Lipoproteins (*n=4*)**

APOB

Apolipoprotein B-100

APOBR

Apolipoprotein B receptor

APOC3

Apolipoprotein C-III

APOE

Apolipoprotein E

**Peroxiredoxins (antioxidant, *n=6*)**

PRDX1

Peroxiredoxin-1

PRDX2

Peroxiredoxin-2

PRDX3

Thioredoxin-dependent peroxide reductase, mitochondrial

PRDX4

Peroxiredoxin-4

PRDX5

Peroxiredoxin-5, mitochondrial

PRDX6

Peroxiredoxin-6

**S100 PROTEINS (*n=8*)**

S100A4

Protein S100-A4

S100A6

Protein S100-A6

S100A9

Protein S100-A9

S100A10

Protein S100-A10

S100A11

Protein S100-A11

S100A12

Protein S100-A12;Calcitermin

S100A13

Protein S100-A13

S100P

Protein S100-P

**Table S2.** Extracellular protein release by osteoblasts and bone marrow MSCs. The table presents a classification of 163 detected proteins belonging to the GO term Extracellular matrix. The proteins were either released by both cell types, showed increased levels in MSCs (marked with blue) or increased levels in osteoblasts (marked with green).

---

**EXTRACELLULAR MATRIX AND MATRICELLULAR MOLECULES (n=72)**  
**Collagen (n=20):** COL1A1, COL1A2, COL2A1, COL3A1, COL4A1, COL4A2, COL5A1, COL5A2, COL5A3, COL6A1, COL6A2, COL6A3, COL7A1, COL8A1, COL10A1, COL11A1, COL12A1, COL14A1, COL16A1, COL18A1.  
**Fibulin (n=5):** N1, FBLN2, FBLN5, EFEMP1, EFEMP2.  
**Fibrillin (n=2):** FBN1, FBN2.  
**Laminin (n=6):** LAMA1, LAMA2, LAMA4, LAMB2, LAMB1, LAMC1.  
**Galectin (n=2):** LGALS1, LGALS3, LGALS3BP.  
**Thrombospondin (n=4):** THBS1, THBS2, THBS3, THBS4.  
**Other matrix molecules (n=33):** ABI3BP, ACAN, AGR, BGN, CSPG4, DCN, ECM1, ECM2, ELN, EMILIN1, FCN1, FMOD, FN1, HAPLN1, HMCN1, HSPG2, LOXL3, LUM, MFAP2, MFAP5, MFGE8, MGP, NID1, NID2, OGN, OMD, MXRA5, NDNF, PODN, POSTN, PRELP, PRG4, SPARC3, TNC, VCAN.

---

**PROTEASES, PROTEASE ENHANCERS (n=14)**  
ADAM9, ADAM10, ADAM19, ADAMTS1, ADAMTS2, ADAMTS4, ELANE, MMP2, MMP1, MMP8, MMP9, MMP11, MMP14, HTRA1, PCOLCE, PRTN3.

---

**PROTEASE INHIBITORS (n=16)**  
**Serpins (n=8):** SERPINB1, SERPINB6, SERPINB8, SERPIN1, SERPIN2, SERPINF1, SERPING1, SERPINH1.  
**Cathepsins (n=6):** CTSB, CTSC, CTSD, CTSG, CTSS, CTSZ.  
**Other protease inhibitors (n=2):** TIMP1, TIMP2.

---

**OTHER ENZYMES (n=7)**  
LOX, LOX1, LOX2, PKM, PLOD3, SOD3, SULF1

---

**CYTOKINES, SOLUBLE MEDIATORS (n=13)**  
**Cytokines (n=6):** ANGPTL2, ANXA2, CLC, HPX, HDGF, S100A8  
**Cytokine modulators (n=7):** IGFALS, IGFBP7, LPBP1, LTBP2, LTBP3, TGFB1, TNFRSF11B

---

**CELL SURFACE MEMBRANE (n=16)**  
**Adhesion molecules (n=4):** CD248, FLRT2, GPC1, NCAM1.  
**Other cell surface membrane molecules or secreted mediators (n=12):** ALPL, ANXA1, ANXA5, CDH13, CDH14, COLEC12, GPIBA, LRRC15, PXDN, SEMA7A, SSC5D, VASN.

---

**SECRETION, EXOCYTOSIS, EXOSOMES (n=3)**  
ANXA6, CLEC3B, S100A6

---

**OTHER MOLECULES (n=21)**  
AEBP1 (transcription), APOE (metabolism), CALR (endoplasmatic reticulum), CCDC80 (peroxiredoxin?), CHI3L1, CLU (chaperone), CTH3C1, EDIL3, F13A1 (coagulation), HSP90B1 (chaperone), GREM1 (BMP antagonist), HNRNPM (nuclear RNA binding), PSAP (lysosome), PTX3, S100A10 (cytoplasm-nucleus), S100A9 (casein kinase modulator), SMOC1, SPON2, TGFB1 (enzyme), TGM2 (enzyme), VASP, WNT5B (Wnt signaling).

---

**Table S3.** Constitutive protein release by *in vitro* cultured MSCs derived from 10 donors; an overview of 426 proteins reaching detectable levels for at least nine of the 10 MSC donors.

|          |          |           |           |          |          |          |          |
|----------|----------|-----------|-----------|----------|----------|----------|----------|
| ABI3BP   | CDH11    | EEF2      | HNRNPA1   | MCAM     | PLXDC2   | RSU1     | TUBB2A/B |
| ACLY     | CDH13    | EFEMP2    | HNRNPA2B1 | MDH1     | PLXNB2   | RTN4     | TUBB4A/B |
| ACTB     | CDH2     | EIF5A     | HNRNPA3   | MDH2     | PNP      | S100A11  | TWF2     |
| ACTC1    | CFL1     | EIF6      | HNRNPK    | MFGE8    | POSTN    | SAMHD1   | TXN      |
| ACTG1    | CLEC11A  | EMILIN1   | HSP90AB1  | MMP1     | POSTN    | SDC1     | TXNDC5   |
| ACTN1    | CLIC1    | ENO1      | HSP90B1   | MMP14    | PPIA     | SDF4     | TXNL1    |
| ACTN4    | CLIC4    | ENPP2     | HSP90AA1  | MMP2     | PPIB     | SEMA7A   | TXNRD1   |
| ACTR2    | CLSTN1   | ERH       | HSPA1B    | MRC2     | PPP1R14B | SEPT11   | UBE2L3   |
| ACTR3    | CLTC     | ERP29     | HSPA4     | MSN      | PPP2R1A  | SERBP1   | UBE2V1   |
| ADAM10   | CLU      | EXT1      | HSPA5     | MTPN     | PRDX1    | SERPINB6 | UCHL1    |
| ADAM9    | CNDP2    | EXTL2     | HSPA8     | MVP      | PRDX2    | SERPINE1 | UGP2     |
| ADAMTSL1 | CNN3     | EZR       | HSPA9     | MXRA8    | PRDX3    | SERPINE2 | ULBP2    |
| ADH5     | COL10A1  | FABP5     | HSPD1     | MYH9     | PRDX6    | SERPINF1 | VASN     |
| AEBP1    | COL11A1  | FAM129B   | HSPE1     | MYL12A/B | PRSS23   | SERPINH1 | VCAN     |
| AHNAK    | COL12A1  | FAP       | HSPG2     | MYL6     | PSAP     | SET      | VCL      |
| AK2      | COL16A1  | FASN      | HTRA1     | NAGK     | PSAT1    | SF3B1    | VCP      |
| AKAP12   | COL18A1  | FBLN1     | IGFBP3    | NAMPT    | PSMA1    | SH3BGR1  | VIM      |
| AKR1A1   | COL1A1   | FBLN1     | IGFBP4    | NCL      | PSMA2    | SH3BGR13 | WDR1     |
| AKR1B1   | COL1A2   | FBLN5     | IGFBP6    | NEDD8    | PSMA3    | SLC3A2   | XYLT1    |
| ALCAM    | COL3A1   | FBN1      | IGFBP7    | NID1     | PSMA4    | SMOC1    | YBX1     |
| ALDOA    | COL4A1   | FH        | ILF2      | NID2     | PSMA5    | SOD1     | YWHAB    |
| ANP32A   | COL4A2   | FKBP1A    | ILF3      | NME1     | PSMA6    | SPARC    | YWHAE    |
| ANPEP    | COL5A1   | FLNA      | INHBA     | NME2     | PSMA7    | SPOCK1   | YWHAG    |
| ANTXR1   | COL5A2   | FLNB      | IGF2      | NPC2     | PSMB1    | SPON2    | YWHAQ    |
| ANXA2    | COL6A1   | FN1       | IQGAP1    | NPM1     | PSMB2    | SPTAN1   | YWHAZ    |
| ANXA6    | COL6A2   | FN1       | IRF2BP2   | NQO1     | PSMB3    | SRGN     | ZYX      |
| APEX1    | COL6A3   | FSCN1     | ISLR      | NRP1     | PSMB5    | SRPX     |          |
| APLP2    | COL7A1   | FSTL1     | ITGA5     | NRP2     | PSMB6    | SRPX2    |          |
| APP      | COL8A1   | GALNT10   | ITGBL1    | NT5E     | PSMB7    | STC1     |          |
| ARHGDI1  | COLEC12  | GALNT2    | ITM2B     | NUCB1    | PTBP1    | STC2     |          |
| ARPC1B   | COMP     | GALNT5    | KPNB1     | NUCB2    | PTGDS    | STMN1    |          |
| ARPC2    | COTL1    | GANAB     | KRT6B     | NUTF2    | PTK7     | SYNCRIP  |          |
| ARPC4    | CPA4     | GAPDH     | LAMA4     | OLFML2B  | PTMA     | TAGLN    |          |
| ATP5B    | CPPED1   | GAS6      | LAMB1     | OLFML3   | PTPRG    | TAGLN2   |          |
| ATP6AP1  | CSF1     | GDI2      | LAMC1     | P4HB     | PTPRK    | TF       |          |
| ATP6AP2  | CSPG4    | GGH       | LCP1      | PABPN1   | PTX3     | TGFBI    |          |
| B2M      | CSRP1    | GOLM1     | LDHA      | PAM      | PXDN     | TGOLN2   |          |
| BASP1    | CST3     | GPC1      | LDHB      | PARK7    | QSOX1    | THBS1    |          |
| BGN      | CTHRC1   | GPI       | LGALS1    | PCMT1    | RAD23B   | THBS2    |          |
| BLMH     | CTSB     | GREM1     | LGALS3BP  | PCOLCE   | RAN      | TIMP1    |          |
| BMP1     | CTSD     | GRN       | LMAN2     | PDIA3    | RCN1     | TIMP2    |          |
| C1QBP    | CTSL     | GSN       | LMNA      | PDIA4    | RCN3     | TKT      |          |
| C1R      | CTSZ     | GSTO1     | LMNB1     | PDLIM5   | RNASET2  | TLN1     |          |
| C1S      | CYR61    | GSTP1     | LOX       | PEBP1    | RNH1     | TMOD3    |          |
| CALD1    | DAG1     | HAPLN1    | LOXL2     | PFN1     | RPL12    | TMSB10   |          |
| CALR     | DBN1     | HARS      | LRP1      | PGAM1    | RPL17    | TMSB4X   |          |
| CALU     | DCN      | HCRTR1    | LRRFIP1   | PGD      | RPL30    | TP53I3   |          |
| CANT1    | DDB1     | HDGF      | LSM8      | PGK1     | RPL4     | TPI1     |          |
| CAP1     | DKK3     | HEXB      | LTA4H     | PGLS     | RPLP0    | TPM3     |          |
| CAPG     | DNAH6    | HIST1H1C  | LTBP1     | PGM2     | RPLP1    | TPM4     |          |
| CAPZA1   | DPP3     | HIST1H2AJ | LTBP2     | PKM      | RPLP2    | TPP1     |          |
| CAT      | DPYSL2   | HIST1H4A  | LUM       | PLAU     | RPS12    | TPT1     |          |
| CBX3     | ECM1     | HIST2H2AC | MAN1A1    | PLEC     | RPS27A   | TRIM28   |          |
| CCDC80   | EEF1A1/2 | HLA-A     | MAN1B1    | PLOD1    | RPS28    | TSN      |          |
| CD109    | EEF1B2   | HLA-B     | MAP1B     | PLOD2    | RPS3     | TSSK4    |          |
| CD248    | EEF1D    | HMGA1     | MAP4      | PLOD3    | RPSA     | TTN      |          |
| CDC37    | EEF1G    | HMG2      | MARCKS    | PLTP     | RRBP1    | TUBA1A/B |          |

**Table S4.** Constitutive protein release by *in vitro* cultured osteoblasts derived from 9 donors; an overview of 317 proteins reaching detectable levels for at least eight of the nine osteoblast donors.

|          |         |           |          |        |          |        |     |
|----------|---------|-----------|----------|--------|----------|--------|-----|
| ABI3BP   | CLEC11A | FKBP1A    | HSPA8    | NME1   | PSMB1    | TAGLN  | ZYX |
| ACAN     | CLEC3B  | FLNA      | HSPB1    | NME2   | PSMB2    | TAGLN2 |     |
| ACTB     | CLSTN1  | FLNB      | HSPD1    | NPC2   | PSMB6    | TALDO1 |     |
| ACTC1    | CLU     | FMOD      | HSPG2    | NPM1   | PSME1    | TBCA   |     |
| ACTG1    | COL11A1 | FN1       | HTRA1    | NRP1   | PTK7     | TF     |     |
| ACTN1    | COL12A1 | FSCN1     | IGF2R    | NUCB1  | PTMA     | TGFBI  |     |
| ACTN4    | COL1A1  | FST       | IGFBP3   | OLFML3 | PTMS     | THBS1  |     |
| ACTR3    | COL1A2  | FSTL1     | IGFBP4   | P4HB   | PTX3     | THBS2  |     |
| ADAM10   | COL3A1  | GALNT2    | IGFBP6   | PAM    | PXDN     | TIMP1  |     |
| ADAM9    | COL4A2  | GANAB     | IGFBP7   | PARK7  | QSOX1    | TIMP2  |     |
| AEBP1    | COL5A1  | GAPDH     | INHBA    | PCOLCE | RAN      | TKT    |     |
| AHCY     | COL5A2  | GAS6      | IQGAP1   | PDIA3  | RCN1     | TLN1   |     |
| AHNAK    | COL6A1  | GDI2      | ISLR     | PDIA4  | RCN3     | TMSB10 |     |
| AKR1A1   | COL6A2  | GOLM1     | LAMA4    | PDIA6  | RNASET2  | TMSB4X |     |
| ALDOA    | COL6A2  | GPC1      | LAMB1    | PEBP1  | RNH1     | TPI1   |     |
| ANP32A   | COL6A3  | GPI       | LAMC1    | PFN1   | RPL10A   | TPM1   |     |
| ANPEP    | COMP    | GREM1     | LASP1    | PGAM1  | RPL12    | TPM3   |     |
| ANXA2    | CORO1C  | GSN       | LCP1     | PGD    | RPLP0    | TPM4   |     |
| APOB     | COTL1   | GSTO1     | LDHA     | PGK1   | RPLP1    | TPP1   |     |
| APOC3    | CPPED1  | GSTP1     | LDHB     | PGLS   | RPLP2    | TPT1   |     |
| APP      | CSR1P   | GAA       | LGALS1   | PKM    | RPS27A   | TSSK4  |     |
| ARHGDI1A | CST3    | HBA1      | LGALS3BP | PLEC   | RPS3     | TTN    |     |
| ARPC1B   | CTGF    | HBB       | LMNA     | PLOD1  | RTN4     | TUBA1B |     |
| ARPC2    | CTSA    | HDGF      | LOX      | PLOD2  | S100A11  | TUBB   |     |
| ARPC4    | CTSB    | HEXA      | LOXL2    | PLOD3  | SDF4     | TXN    |     |
| ATP5B    | CTSD    | HEXB      | LRP1     | PNP    | SEMA7A   | TXNDC5 |     |
| B2M      | CTSL    | HIST1H3A  | LTA4H    | POSTN  | SERPBP1  | TXNRD1 |     |
| BASP1    | CTSZ    | HIST1H4A  | LTBP1    | PPIA   | SERPINB1 | UBA1   |     |
| BGN      | DAG1    | HIST2H2AC | LTBP2    | PPIB   | SERPINE1 | UBE2V1 |     |
| C1R      | DAP     | HLA-A     | LTF      | PRCP   | SERPINE2 | UCHL1  |     |
| C1S      | DCN     | HLA-C     | LUM      | PRDX1  | SERPINF1 | VASN   |     |
| CALD1    | DPP3    | HMGA1     | MAP4     | PRDX2  | SERPING1 | VCAM1  |     |
| CALR     | DPYSL2  | HMG2      | MARCKS   | PRDX3  | SERPINH1 | VCAN   |     |
| CALU     | ECM1    | HNRNPA1   | MDH1     | PRDX6  | SET      | VCL    |     |
| CAP1     | EEF1A1  | HNRNPA2B1 | MDH2     | PRKCSH | SH3BGRL3 | VCP    |     |
| CAPG     | EEF2    | HNRNPA3   | MFGE8    | PROCR  | SNRPD2   | VIM    |     |
| CAT      | EFEMP1  | HNRNPD    | MMP2     | PROS1  | SPARC    | WDR1   |     |
| CCDC80   | EFEMP2  | HNRNPK    | MSN      | PSAP   | SPOCK1   | XYLT1  |     |
| CD109    | EIF5A   | HSP90AB1  | MT2A     | PSMA1  | SPTAN1   | YBX1   |     |
| CD248    | EMILIN1 | HSP90B1   | MYH9     | PSMA2  | SPTBN1   | YWHAB  |     |
| CD44     | ENO1    | HSP90AA1  | MYL6     | PSMA3  | SRGN     | YWHAE  |     |
| CDH11    | ENPP2   | HSPA1B    | MYO18B   | PSMA4  | STC2     | YWHAG  |     |
| CDH13    | FBLN1   | HSPA4     | NCL      | PSMA5  | STMN1    | YWHAH  |     |
| CFD      | FBLN1   | HSPA5     | NID1     | PSMA6  | SUMO2    | YWHAQ  |     |
| CFL1     | FBN1    | HSPA6     | NID2     | PSMA7  | SYNCRIP  | YWHAZ  |     |

**Table S5.** Constitutive protein release by *in vitro* cultured MSCs derived from 10 donors and osteoblasts derived from 9 donors; an overview of 269 common proteins reaching detectable levels for at least nine MSC and eight osteoblast donors.

|         |         |           |        |          |         |       |
|---------|---------|-----------|--------|----------|---------|-------|
| ABI3BP  | COL1A1  | GOLM1     | LOX    | POSTN    | SH3BGL3 | YWHAQ |
| ACTB    | COL1A2  | GPC1      | LOXL2  | PPIA     | SPARC   | YWHAQ |
| ACTC1   | COL3A1  | GPI       | LRP1   | PPIB     | SPOCK1  | YWHAZ |
| ACTG1   | COL4A2  | GREM1     | LTA4H  | PRDX1    | SPTAN1  | ZYX   |
| ACTN1   | COL5A1  | GSN       | LTBP1  | PRDX2    | SRGN    |       |
| ACTN4   | COL5A2  | GSTO1     | LTBP2  | PRDX3    | STC2    |       |
| ACTR3   | COL6A1  | GSTP1     | LUM    | PRDX6    | STMN1   |       |
| ADAM10  | COL6A2  | HDGF      | MAP4   | PSAP     | SYNCRIP |       |
| ADAM9   | COL6A3  | HEXB      | MARCKS | PSMA1    | TAGLN   |       |
| AEBP1   | COMP    | HIST1H4A  | MDH1   | PSMA2    | TAGLN2  |       |
| AHNAK   | COTL1   | HIST2H2AC | MDH2   | PSMA3    | TF      |       |
| AKR1A1  | CPPED1  | HLA-A     | MFGE8  | PSMA4    | TGFBI   |       |
| ALDOA   | CSRP1   | HMGA1     | MMP2   | PSMA5    | THBS1   |       |
| ANP32A  | CST3    | HMG2      | MSN    | PSMA6    | THBS2   |       |
| ANPEP   | CTSB    | HNRNPA1   | MYH9   | PSMA7    | TIMP1   |       |
| ANXA2   | CTSD    | HNRNPA2B1 | MYL6   | PSMB1    | TIMP2   |       |
| APP     | CTSL    | HNRNPA3   | NCL    | PSMB2    | TKT     |       |
| ARHGDI1 | CTSZ    | HNRNPK    | NID1   | PSMB6    | TLN1    |       |
| ARPC1B  | DAG1    | HSP90AB1  | NID2   | PTK7     | TMSB10  |       |
| ARPC2   | DCN     | HSP90B1   | NME1   | PTMA     | TMSB4X  |       |
| ARPC4   | DPP3    | HSP90AA1  | NME2   | PTX3     | TPI1    |       |
| ATP5B   | DPYSL2  | HSPA1B    | NPC2   | PXDN     | TPM3    |       |
| B2M     | ECM1    | HSPA4     | NPM1   | QSOX1    | TPM4    |       |
| BASP1   | EEF1A1  | HSPA5     | NRP1   | RAN      | TPP1    |       |
| BGN     | EEF2    | HSPA8     | NUCB1  | RCN1     | TPT1    |       |
| C1R     | EFEMP2  | HSPD1     | OLFML3 | RCN3     | TSSK4   |       |
| C1S     | EIF5A   | HSPG2     | P4HB   | RNASET2  | TTN     |       |
| CALD1   | EMILIN1 | HTRA1     | PAM    | RNH1     | TUBA1B  |       |
| CALR    | ENO1    | IGFBP3    | PARK7  | RPL12    | TUBB    |       |
| CALU    | ENPP2   | IGFBP4    | PCOLCE | RPLP0    | TXN     |       |
| CAP1    | FBLN1   | IGFBP6    | PDIA3  | RPLP1    | TXNDC5  |       |
| CAPG    | FBLN1   | IGFBP7    | PDIA4  | RPLP2    | TXNRD1  |       |
| CAT     | FBN1    | INHBA     | PEBP1  | RPS27A   | UBE2V1  |       |
| CCDC80  | FKBP1A  | IQGAP1    | PFN1   | RPS3     | UCHL1   |       |
| CD109   | FLNA    | ISLR      | PGAM1  | RTN4     | VASN    |       |
| CD248   | FLNB    | LAMA4     | PGD    | S100A11  | VCAN    |       |
| CDH11   | FN1     | LAMB1     | PGK1   | SDF4     | VCL     |       |
| CDH13   | FSCN1   | LAMC1     | PGLS   | SEMA7A   | VCP     |       |
| CFL1    | FSTL1   | LCP1      | PKM    | SERPBP1  | VIM     |       |
| CLEC11A | GALNT2  | LDHA      | PLEC   | SERPINE1 | WDR1    |       |
| CLSTN1  | GANAB   | LDHB      | PLOD1  | SERPINE2 | XYLT1   |       |
| CLU     | GAPDH   | LGALS1    | PLOD2  | SERPINF1 | YBX1    |       |
| COL11A1 | GAS6    | LGALS3BP  | PLOD3  | SERPINH1 | YWHAB   |       |
| COL12A1 | GDI2    | LMNA      | PNP    | SET      | YWHAE   |       |

**Table S6.** A list of proteins showing significantly increased levels in MSCs compared with osteoblasts. The protein levels were determined in the culture supernatants of *in vitro* cultured cells. The table includes (i) proteins showing detectable levels in at least three osteoblast and three MSC populations and differing significantly based on *p*-values (<0.05) and fold change (FC) (*p*<0.05) as determined by Z-score statistics; and (ii) proteins detected for ≥7 MSC and ≤1 osteoblast population. A total of 80 proteins were identified; peptides from fibronectin and periostin were annotated to two different proteins groups (isoform groups), not shown here.

| PROTEIN NAME                                                                                                                                | GENE IDENTITY |
|---------------------------------------------------------------------------------------------------------------------------------------------|---------------|
| Target of Nesh-SH3                                                                                                                          | ABI3BP        |
| Disintegrin and metalloproteinase domain-containing protein 10                                                                              | ADAM10        |
| Disintegrin and metalloproteinase domain-containing protein 9                                                                               | ADAM9         |
| Adipocyte enhancer-binding protein 1                                                                                                        | AEBP1         |
| Fructose-bisphosphate aldolase C                                                                                                            | ALDOC         |
| DNA-(apurinic or apyrimidinic site) lyase;DNA-(apurinic or apyrimidinic site) lyase, mitochondrial                                          | APEX1         |
| Actin-related protein 2/3 complex subunit 3                                                                                                 | ARPC3         |
| V-type proton ATPase subunit S1                                                                                                             | ATP6AP1       |
| Coiled-coil domain-containing protein 80                                                                                                    | CCDC80        |
| CD109 antigen                                                                                                                               | CD109         |
| Cadherin-11                                                                                                                                 | CDH11         |
| Cadherin-2                                                                                                                                  | CDH2          |
| Chitinase domain-containing protein 1                                                                                                       | CHID1         |
| Carbohydrate sulfotransferase 11                                                                                                            | CHST11        |
| C-type lectin domain family 11 member A                                                                                                     | CLEC11A       |
| Clusterin;Clusterin beta chain;Clusterin alpha chain                                                                                        | CLU           |
| Collagen alpha-1(X) chain                                                                                                                   | COL10A1       |
| Collagen alpha-1(XI) chain                                                                                                                  | COL11A1       |
| Collagen alpha-1(XVIII) chain;Endostatin                                                                                                    | COL18A1       |
| Collagen alpha-1(I) chain                                                                                                                   | COL1A1        |
| Collagen alpha-2(I) chain                                                                                                                   | COL1A2        |
| Collagen alpha-1(III) chain                                                                                                                 | COL3A1        |
| Collagen alpha-1(IV) chain;Arresten                                                                                                         | COL4A1        |
| Collagen alpha-2(V) chain                                                                                                                   | COL5A2        |
| Collagen alpha-2(VI) chain                                                                                                                  | COL6A2        |
| Collagen alpha-1(VII) chain                                                                                                                 | COL7A1        |
| Collagen alpha-1(VIII) chain;Vastatin                                                                                                       | COL8A1        |
| Chondroitin sulfate proteoglycan 4                                                                                                          | CSPG4         |
| Collagen triple helix repeat-containing protein 1                                                                                           | CTHRC1        |
| Dipeptidyl peptidase 1; Dipeptidyl peptidase 1 exclusion domain chain;Dipeptidyl peptidase 1 heavy chain;Dipeptidyl peptidase 1 light chain | CTSC          |
| Extracellular matrix protein 1                                                                                                              | ECM1          |
| Eukaryotic translation initiation factor 3 subunit J                                                                                        | EIF3J         |
| Eukaryotic translation initiation factor 4B                                                                                                 | EIF4B         |
| EMILIN-1                                                                                                                                    | EMILIN1       |
| Ectonucleotide pyrophosphatase/phosphodiesterase family member 1;Alkaline phosphodiesterase I;Nucleotide pyrophosphatase                    | ENPP1         |
| Fibulin-5                                                                                                                                   | FBLN5         |



|                                                                                          |          |
|------------------------------------------------------------------------------------------|----------|
| Fibronectin                                                                              | FN1      |
| Glutamine amidotransferase-like class 1 domain-containing protein 3A, mitochondrial      | GATD3A   |
| Golgi membrane protein 1                                                                 | GOLM1    |
| Gremlin-1                                                                                | GREM1    |
| GrpE protein homolog 1, mitochondrial                                                    | GRPEL1   |
| Hyaluronan and proteoglycan link protein 1                                               | HAPLN1   |
| Hemicentin-1                                                                             | HMCN1    |
| Heterogeneous nuclear ribonucleoprotein U-like protein 2                                 | HNRNPUL2 |
| Heat shock factor-binding protein 1                                                      | HSBP1    |
| Stress-70 protein, mitochondrial                                                         | HSPA9    |
| Insulin;Insulin B chain;Insulin A chain;Insulin, isoform 2                               | INS      |
| Low-density lipoprotein receptor                                                         | LDLR     |
| Lysosomal acid lipase/cholesteryl ester hydrolase                                        | LIPA     |
| Lysyl oxidase homolog 3                                                                  | LOXL3    |
| Latent-transforming growth factor beta-binding protein 1                                 | LTBP1    |
| Mannosyl-oligosaccharide 1,2-alpha-mannosidase IA                                        | MAN1A1   |
| Microtubule-associated protein RP/EB family member 1                                     | MAPRE1   |
| Cell surface glycoprotein MUC18                                                          | MCAM     |
| Hepatocyte growth factor receptor                                                        | MET      |
| Interstitial collagenase;22 kDa interstitial collagenase;27 kDa interstitial collagenase | MMP1     |
| Stromelysin-3                                                                            | MMP11    |
| Major vault protein                                                                      | MVP      |
| Nidogen-1                                                                                | NID1     |
| Neuropilin-2                                                                             | NRP2     |
| Succinyl-CoA:3-ketoacid coenzyme A transferase 1, mitochondrial                          | OXCT1    |
| Protocadherin gamma-C3                                                                   | PCDHGC3  |
| Procollagen C-endopeptidase enhancer 1                                                   | PCOLCE   |
| Urokinase-type plasminogen activator                                                     | PLAU     |
| Phospholipid transfer protein                                                            | PLTP     |
| Periostin                                                                                | POSTN    |
| Inactive tyrosine-protein kinase 7                                                       | PTK7     |
| 60S ribosomal protein L30                                                                | RPL30    |
| Ribosome-binding protein 1                                                               | RRBP1    |
| Syndecan-1                                                                               | SDC1     |
| Semaphorin-7A                                                                            | SEMA7A   |
| Serpin B7                                                                                | SERPINB7 |
| Sushi repeat-containing protein SRPX                                                     | SRPX     |
| Stanniocalcin-1                                                                          | STC1     |
| Small ubiquitin-related modifier 1                                                       | SUMO1    |
| Serotransferrin                                                                          | TF       |
| Transforming growth factor beta-1;Latency-associated peptide                             | TGFB1    |
| Tenascin                                                                                 | TNC      |
| Vesicle-associated membrane protein-associated protein A                                 | VAPA     |
| Vasodilator-stimulated phosphoprotein                                                    | VASP     |

---

**Table S7.** Proteins showing increased constitutive release by *in vitro* cultured human MSCs. The table lists the proteins showing significantly increased levels in MSCs compared with osteoblasts. The table includes (i) proteins showing detectable levels in at least three osteoblast and three MSC populations and differing significantly based on *p*-values (<0.05) and fold change (FC, *p*<0.05); and (ii) proteins detected for  $\geq 7$  MSC and  $\leq 1$  osteoblast population. A total of 80 proteins were identified; peptides from fibronectin and periostin were annotated to two different proteins groups (isoform groups) not shown here. The table presents the protein identity (i.e. encoding gene), a brief description of the encoded protein and key words describing important structure/function of the protein. The information is based on the Gene database and selected references from the PubMed database. Yellow background color indicates extracellular matrix molecules, green color adhesion molecules and blue color proteases.

| IDENTITY | SUMMARY                                                                                                                                                                                                                                                                                                                                                                                                                                                                                                                                                                                                                                                                       | KEY WORDS                                                       |
|----------|-------------------------------------------------------------------------------------------------------------------------------------------------------------------------------------------------------------------------------------------------------------------------------------------------------------------------------------------------------------------------------------------------------------------------------------------------------------------------------------------------------------------------------------------------------------------------------------------------------------------------------------------------------------------------------|-----------------------------------------------------------------|
| ABI3BP   | <i>ABI family member 3 binding protein.</i> ABI3BP is a relatively newly identified protein whose general biological functions are not yet fully defined. It is implicated in promoting cellular senescence and cell-extracellular matrix interactions; both ABI3BP and ABI3 are downregulated in cancers further with supporting evidence that they are both important in promoting cellular senescence. ABI3BP is best known for its role in multiple forms of cancer, acting as a tumor suppressor via promotion of cellular senescence. ABI3BP is also known as an extracellular/interstitial matrix protein and plays a role in cell-substrate adhesion (PMID 30923710). | Extracellular matrix<br>Tumor suppressor<br>Inducing senescence |
| ADAM9    | <i>ADAM metalloproteinase domain 9.</i> This gene encodes a member of the ADAM (a disintegrin and metalloprotease domain) family. Members of this family are membrane-anchored proteins and have been implicated in cell-cell and cell-matrix interactions. The protein encoded by this gene interacts with SH3 domain-containing proteins, binds mitotic arrest deficient 2 beta protein, and is also involved in shedding of membrane-anchored heparin-binding EGF-like growth factor.                                                                                                                                                                                      | Peptidase<br>Adhesion<br>Cytokine binding                       |
| ADAM10   | <i>ADAM metalloproteinase domain 10.</i> Members of the ADAM family are cell surface proteins with a unique structure possessing both potential adhesion and protease domains. This gene encodes an ADAM family member that cleaves many proteins including TNF-alpha and E-cadherin.                                                                                                                                                                                                                                                                                                                                                                                         | Peptidase<br>Adhesion                                           |
| AEBP1    | <i>AE binding protein 1.</i> This member of the carboxypeptidase A protein family may function as a transcriptional repressor.                                                                                                                                                                                                                                                                                                                                                                                                                                                                                                                                                | Peptidase<br>Transcription                                      |
| ALDOC    | <i>Aldolase C, fructose-bisphosphate.</i> This is a member of the aldolase family of enzymes that is an enzyme of the glycolysis pathway and catalyzes the conversion of fructose-1,6-bisphosphate to glyceraldehyde-3-phosphate and dihydroxyacetone phosphate.                                                                                                                                                                                                                                                                                                                                                                                                              | Metabolism<br>Glycolysis                                        |
| APEX1    | <i>Apurinic/apyrimidinic endodeoxyribonuclease 1.</i> The APEX gene encodes the major AP endonuclease in human cells. It encodes the APEX endonuclease, a DNA repair enzyme with apurinic/apyrimidinic (AP) activity. Such AP activity sites occur frequently in DNA molecules by spontaneous hydrolysis, by DNA damaging agents or by DNA glycosylases that remove specific abnormal bases.                                                                                                                                                                                                                                                                                  | Endonuclease<br>DNA repair                                      |
| ARPC3    | <i>Actin related protein 2/3 complex subunit 3.</i> This protein is one of seven subunits of the human Arp2/3 protein complex that is implicated in the control of actin polymerization in cells.                                                                                                                                                                                                                                                                                                                                                                                                                                                                             | Cytoskeleton<br>Actin                                           |
| ATP6AP1  | <i>ATPase H<sup>+</sup> transporting accessory protein 1.</i> This is a component of a multisubunit enzyme that mediates acidification of eukaryotic intracellular organelles, i.e. the Vacuolar ATPase (V-ATPase) that is comprised of a cytosolic V1 (site of the ATP                                                                                                                                                                                                                                                                                                                                                                                                       | V-ATPase<br>Protein sorting                                     |

|         |                                                                                                                                                                                                                                                                                                                                                                                                                                                                                                             |                                                                  |
|---------|-------------------------------------------------------------------------------------------------------------------------------------------------------------------------------------------------------------------------------------------------------------------------------------------------------------------------------------------------------------------------------------------------------------------------------------------------------------------------------------------------------------|------------------------------------------------------------------|
|         | catalytic site) and a transmembrane V0 domain. V-ATPase dependent organelle acidification is necessary for such intracellular processes as protein sorting and receptor-mediated endocytosis.                                                                                                                                                                                                                                                                                                               | Endocytosis                                                      |
| CCDC80  | <i>Coiled-coil domain containing 80</i> . Involved in FAK/E-cadherin signaling (PMID 30214608). Focal adhesion kinase (FAK) is a non-receptor tyrosine kinase involved in the development and progression of cancer.                                                                                                                                                                                                                                                                                        | Adhesion<br>Cadherin                                             |
| CD109   | <i>CD109</i> . This glycosyl phosphatidylinositol (GPI)-linked glycoprotein localizes to the surface. It binds to and negatively regulates signaling by transforming growth factor beta (TGF-beta).                                                                                                                                                                                                                                                                                                         | Cell surface<br>TGFβ                                             |
| CDH11   | <i>Cadherin 11</i> . This gene encodes a type II classical cadherin from the cadherin superfamily, integral membrane proteins that mediate calcium-dependent cell-cell adhesion. Type II (atypical) cadherins are defined based on their lack of a HAV cell adhesion recognition sequence specific to type I cadherins.                                                                                                                                                                                     | Cadherin                                                         |
| CDH2    | <i>Cadherin 2</i> . This classical cadherin has multiple transcript variants, at least one of which encodes a preproprotein that is proteolytically processed to generate a calcium-dependent cell adhesion molecule and glycoprotein.                                                                                                                                                                                                                                                                      | Adhesion                                                         |
| CHID1   | <i>Chitinase domain containing 1</i> . This chitinase-like molecule may have a role as a growth factor. It interacts with syndecan, stimulated chemokine production and MMP9 release.                                                                                                                                                                                                                                                                                                                       | Syndecan<br>Chemokine, MMP9.                                     |
| CHST11  | <i>Carbohydrate sulfotransferase 11</i> . The protein belongs to the sulfotransferase 2 family. It is localized to the Golgi membrane, and catalyzes the transfer of sulfate to position 4 of the N-acetylgalactosamine (GalNAc) residue of chondroitin. Chondroitin sulfate constitutes the predominant proteoglycan and is distributed on the surfaces of many cells and extracellular matrices.                                                                                                          | Golgi<br>Cell surface                                            |
| CLEC11A | <i>C-type lectin domain containing 11A</i> . This protein belongs to the C-type lectin superfamily. It is a secreted sulfated glycoprotein and functions as a growth factor for primitive hematopoietic progenitor cells.                                                                                                                                                                                                                                                                                   | Hematopoietic growth factor                                      |
| CLU     | Clusterin. The protein is a secreted chaperone that can under some stress conditions also be found in the cell cytosol. It is possibly involved in several basic biological events such as cell death and cancer progression.                                                                                                                                                                                                                                                                               | Chaperone                                                        |
| COL10A1 | <i>Collagen type X alpha 1 chain</i> . The alpha chain of type X collagen is a short chain collagen. Unlike type VIII collagen, the other short chain collagen, type X collagen is a homotrimer.                                                                                                                                                                                                                                                                                                            | Collagen<br>Extracellular matrix                                 |
| COL11A1 | <i>Collagen type XI alpha 1 chain</i> . This gene encodes one of the two alpha chains of type XI collagen, a minor fibrillar collagen. Type XI collagen is a heterotrimer but the third alpha chain is a post-translationally modified alpha 1 type II chain.                                                                                                                                                                                                                                               | Collagen<br>Extracellular matrix                                 |
| COL18A1 | <i>Collagen type XVIII alpha 1 chain</i> . This gene encodes the alpha chain of type XVIII collagen. This collagen is one of the multiplexins, extracellular matrix proteins that contain multiple triple-helix domains (collagenous domains) interrupted by non-collagenous domains. Proteolytic processing at several endogenous cleavage sites in the C-terminal domain results in production of endostatin, a potent antiangiogenic protein that is able to inhibit angiogenesis and tumor growth.      | Collagen<br>Extracellular matrix<br>Endostatin<br>Antiangiogenic |
| COL1A1  | <i>Collagen type I alpha 1 chain</i> . This gene encodes the pro-alpha1 chains of type I collagen whose triple helix comprises two alpha1 chains and one alpha2 chain. Type I is a fibril-forming collagen.                                                                                                                                                                                                                                                                                                 | Collagen<br>Extracellular matrix                                 |
| COL1A2  | <i>Collagen type III alpha 2 chain</i> . This gene encodes the pro-alpha2 chain of type I collagen whose triple helix comprises two alpha1 chains and one alpha2 chain.                                                                                                                                                                                                                                                                                                                                     | Collagen<br>Extracellular matrix                                 |
| COL3A1  | <i>Collagen type III alpha 1 chain</i> . This gene encodes the pro-alpha1 chains of type III collagen, a fibrillar collagen.                                                                                                                                                                                                                                                                                                                                                                                | Collagen<br>Extracellular matrix                                 |
| COL4A1  | <i>Collagen type IV alpha 1 chain</i> . This gene encodes a type IV collagen alpha protein. Type IV collagen proteins are integral components of basement membranes. The protein consists of an amino-terminal 7S domain, a triple-helix forming collagenous domain, and a carboxy-terminal non-collagenous domain. It functions as part of a heterotrimer and interacts with other extracellular matrix components such as perlecan, proteoglycans, and laminins. In addition, proteolytic cleavage of the | Collagen<br>Extracellular matrix<br>Arresten<br>Antiangiogenic   |

|         |                                                                                                                                                                                                                                                                                                                                                                                                                                                                                                                                                                                                       |                                                |
|---------|-------------------------------------------------------------------------------------------------------------------------------------------------------------------------------------------------------------------------------------------------------------------------------------------------------------------------------------------------------------------------------------------------------------------------------------------------------------------------------------------------------------------------------------------------------------------------------------------------------|------------------------------------------------|
|         | non-collagenous carboxy-terminal domain results in a biologically active fragment known as arresten, which has anti-angiogenic and tumor suppressor properties.                                                                                                                                                                                                                                                                                                                                                                                                                                       | Tumor suppressor                               |
| COL5A2  | <i>Collagen type V alpha 2 chain</i> . This protein is the alpha chain for one of the low abundance fibrillar collagens. Fibrillar collagen molecules are trimers that can be composed of one or more types of alpha chains. Type V collagen is found in tissues containing type I collagen and appears to regulate the assembly of heterotypic fibers composed of both type I and type V collagen. This gene product is closely related to type XI collagen and it is possible that the collagen chains of types V and XI constitute a single collagen type with tissue-specific chain combinations. | Extracellular matrix<br>Collagen               |
| COL6A2  | <i>Collagen type VI alpha 2 chain</i> . This gene encodes one of the three alpha chains of type VI collagen, a beaded filament collagen found in most connective tissues. The product of this gene contains several domains similar to von Willebrand Factor type A domains. These domains have been shown to bind extracellular matrix proteins, an interaction that explains the importance of this collagen in organizing matrix components.                                                                                                                                                       | Collagen<br>Extracellular matrix               |
| COL7A1  | <i>Collagen type VII alpha 1 chain</i> . This gene encodes the alpha chain of type VII collagen. The type VII collagen fibril, composed of three identical alpha collagen chains, functions as an anchoring fibril.                                                                                                                                                                                                                                                                                                                                                                                   | Collagen<br>Extracellular matrix               |
| COL8A1  | <i>Collagen type VIII alpha 1 chain</i> . This gene encodes one of the two alpha chains of type VIII collagen. The gene product is a short chain collagen. The type VIII collagen fibril can be either a homo- or a heterotrimer.                                                                                                                                                                                                                                                                                                                                                                     | Collagen<br>Extracellular matrix               |
| CSPG4   | <i>Chondroitin sulfate proteoglycan 4</i> . This chondroitin sulfate proteoglycan plays a role in stabilizing cell-substratum interactions. CSPG4 represents an integral membrane chondroitin sulfate proteoglycan.                                                                                                                                                                                                                                                                                                                                                                                   | Adhesion<br>Extracellular matrix               |
| CTHRC1  | <i>Collagen triple helix repeat containing 1</i> . This protein that is involved in vascular remodeling.                                                                                                                                                                                                                                                                                                                                                                                                                                                                                              | Angiogenesis?                                  |
| CTSC    | <i>Cathepsin C</i> . This protein is a member of the peptidase C1 family and is a lysosomal cysteine proteinase that appears to be a central coordinator for activation of many serine proteinases. Alternative splicing results in multiple transcript variants, at least one of which encodes a preproprotein that is proteolytically processed to generate heavy and light chains forming a disulfide-linked dimer. A portion of the propeptide acts as an intramolecular chaperone for the folding and stabilization of the mature enzyme.                                                        | Peptidase<br>Lysosome<br>Chaperone             |
| ECM1    | <i>Extracellular matrix protein 1</i> . This gene encodes a soluble protein that is involved in angiogenesis. It also interacts with a variety of extracellular and structural proteins.                                                                                                                                                                                                                                                                                                                                                                                                              | Extracellular matrix<br>Angiogenesis           |
| EIF3J   | <i>Eukaryotic translation initiation factor 3 subunit J</i> . This gene encodes a core subunit of the eukaryotic initiation factor 3 complex, which participates in the initiation of translation by aiding in the recruitment of protein and mRNA components to the 40S ribosome.                                                                                                                                                                                                                                                                                                                    | Ribosome                                       |
| EIF4B   | <i>Eukaryotic translation initiation factor 4B</i> . Three proteins specifically required for the translation initiation of natural mRNAs, i.e. eIF4A, eIF4B, and eIF4F. The regulation of translation exhibited through the mammalian target of rapamycin (mTOR) pathway is predominately seen as the phosphorylation of 4E-BP, an inhibitor of protein synthesis that functions by binding to the cap binding subunit of eIF4F (eIF4E) (PMID 26324716)                                                                                                                                              | Protein synthesis                              |
| EMILIN1 | <i>Elastin microfibril interfacier 1</i> . This extracellular matrix glycoprotein that is characterized by an N-terminal microfibril interface domain, a coiled-coiled alpha-helical domain, a collagenous domain and a C-terminal globular C1q domain. It associates with elastic fibers at the interface between elastin and microfibrils.                                                                                                                                                                                                                                                          | Extracellular matrix                           |
| ENPP1   | <i>Ectonucleotide pyrophosphatase/phosphodiesterase 1</i> . This pyrophosphatase/phosphodiesterase (ENPP) family member is a type II transmembrane glycoprotein comprising two identical disulfide-bonded subunits. It has broad specificity and cleaves a variety of substrates, including phosphodiester bonds of nucleotides and nucleotide sugars and pyrophosphate bonds of nucleotides and nucleotide sugars. It may also be important for insulin effects.                                                                                                                                     | Phosphodiesterase<br>Transmembrane<br>Insulin? |

|          |                                                                                                                                                                                                                                                                                                                                                                                                                                                                                                                                                                                                  |                                                              |
|----------|--------------------------------------------------------------------------------------------------------------------------------------------------------------------------------------------------------------------------------------------------------------------------------------------------------------------------------------------------------------------------------------------------------------------------------------------------------------------------------------------------------------------------------------------------------------------------------------------------|--------------------------------------------------------------|
| FBLN5    | <i>Fibulin 5</i> . This gene encodes a secreted, extracellular matrix protein containing an Arg-Gly-Asp (RGD) motif and calcium-binding EGF-like domains. It promotes adhesion of endothelial cells through interaction of integrins and the RGD motif. It may play a role in vascular development and remodeling.                                                                                                                                                                                                                                                                               | Extracellular matrix<br>Vascular development                 |
| FN1      | <i>Fibronectin 1</i> . This glycoprotein is present in a soluble dimeric form in plasma, and in a dimeric or multimeric form at the cell surface and in extracellular matrix. The encoded preprotein is proteolytically processed to generate the mature protein. Fibronectin is involved in cell adhesion and migration. The gene has three regions subject to alternative splicing, with the potential to produce 20 different transcript variants, at least one of which encodes an isoform that undergoes proteolytic processing.                                                            | Extracellular matrix<br>Adhesion                             |
| GATD3A   | <i>Glutamine amidotransferase like class 1 domain containing 3A</i> . This is a potential mitochondrial protein that is a member of the DJ-1/Pfp1 gene family.                                                                                                                                                                                                                                                                                                                                                                                                                                   | Mitochondria<br>Metabolism                                   |
| GOLM1    | <i>Golgi membrane protein 1</i> . The Golgi complex plays a key role in the sorting and modification of proteins exported from the endoplasmic reticulum. This protein is a type II Golgi transmembrane protein. It processes proteins synthesized in the rough endoplasmic reticulum and assists in the transport of protein cargo through the Golgi apparatus.                                                                                                                                                                                                                                 | Golgi<br>Protein transport                                   |
| GREM1    | <i>Gremlin 1, DAN family BMP antagonist</i> . This gene encodes a member of the BMP (bone morphogenic protein) antagonist family. The CAN (cerberus and dan) subfamily of BMP antagonists, to which this gene belongs, is characterized by a C-terminal cystine knot with an eight-membered ring. The antagonistic effect of the secreted glycosylated protein encoded by this gene is likely due to its direct binding to BMP proteins.                                                                                                                                                         | BMP antagonist                                               |
| GRPEL1   | <i>GrpE like 1, mitochondrial</i> . The mitochondrial heat shock protein 70 (mtHsp70) is a chaperone contributing to mitochondrial protein quality control. The two nuclear exchange factors GrpE-like 1 (GrpEL1) and GrpEL2 modulate mtHsp70's function and associate with mtHsp70 as a hetero-oligomeric subcomplex and regulate mtHsp70 function (PMID 28848044).                                                                                                                                                                                                                             | Mitochondria<br>HSP70<br>Chaperone                           |
| HAPLN1   | <i>Hyaluronan and proteoglycan link protein 1</i> . The three ECM components hyaluronan and proteoglycan link protein 1 (HAPLN1), lumican and collagen I (collectively, HLC) seem to be form an interacting complex (PMID 30078576)                                                                                                                                                                                                                                                                                                                                                              | Extracellular matrix<br>Collagen                             |
| HMCN1    | <i>Hemicentin 1</i> . This large extracellular member of the immunoglobulin superfamily forms long tracks at specific extracellular sites that are involved in many processes, including cellular anchorage and organization of hemidesmosomes                                                                                                                                                                                                                                                                                                                                                   | Extracellular matrix<br>Adhesion, desmosomes                 |
| HNRNPUL2 | <i>Heterogeneous nuclear ribonucleoprotein U like 2</i> . Long noncoding RNAs (lncRNAs) can be important for development and chemosensitivity of certain cancers. It can form a complex with heterogeneous nuclear ribonucleoprotein U-like 2 protein (hnRNPUL2) and direct the transport of hnRNPUL2 between the nucleus and cytoplasm. hnRNPUL2 may then accumulated in the cytoplasm and increase the RNA stability (PMID 28594403).                                                                                                                                                          | Noncoding RNA                                                |
| HSBP1    | <i>Heat shock factor binding protein 1</i> . Heat shock factor binding protein 1 (HSBP1), is a 76-amino-acid protein that binds to heat shock factor 1(HSF1), which is a transcription factor involved in the heat shock response. During HS response, HSF1 undergoes conformational transition from an inert non-DNA-binding monomer to active functional trimers. HSBP1 is nuclear-localized and interacts with the active trimeric state of HSF1 to negatively regulate HSF1 DNA-binding activity. Overexpression of HSBP1 in mammalian cells represses the transactivation activity of HSF1. | Heat shock response<br>Transcription                         |
| HSPA9    | <i>Heat shock protein family A (Hsp70) member 9</i> . This gene encodes a member of the heat shock protein 70 gene family. The encoded protein is primarily localized to the mitochondria but is also found in the endoplasmic reticulum, plasma membrane and cytoplasmic vesicles. This protein is a heat-shock cognate protein. This protein plays a role in cell proliferation, stress response and maintenance of the mitochondria.                                                                                                                                                          | Heat shock response<br>Mitochondria<br>Endoplasmic reticulum |
| INS      | <i>Insulin</i> . Insuling is an important regulator of A cellular metabolism and proliferation.                                                                                                                                                                                                                                                                                                                                                                                                                                                                                                  | Metabolism                                                   |

|        |                                                                                                                                                                                                                                                                                                                                                                                                                                                                                                                                                                                                                                  |                                                         |
|--------|----------------------------------------------------------------------------------------------------------------------------------------------------------------------------------------------------------------------------------------------------------------------------------------------------------------------------------------------------------------------------------------------------------------------------------------------------------------------------------------------------------------------------------------------------------------------------------------------------------------------------------|---------------------------------------------------------|
| LDLR   | <i>Low density lipoprotein receptor.</i> The low density lipoprotein receptor (LDLR) gene family consists of cell surface proteins involved in receptor-mediated endocytosis of specific ligands. Low density lipoprotein (LDL) is normally bound at the cell membrane and taken into the cell ending up in lysosomes where the protein is degraded and the cholesterol is made available for repression of microsomal enzyme 3-hydroxy-3-methylglutaryl coenzyme A (HMG CoA) reductase, the rate-limiting step in cholesterol synthesis. At the same time, a reciprocal stimulation of cholesterol ester synthesis takes place. | Cholesterol metabolism<br>Cell surface<br>Lysosome      |
| LIPA   | <i>Lipase A, lysosomal acid type.</i> This gene encodes lipase A, the lysosomal acid lipase that functions in the lysosome to catalyze the hydrolysis of cholesteryl esters and triglycerides.                                                                                                                                                                                                                                                                                                                                                                                                                                   | Cholesterol metabolism<br>Lysosome                      |
| LOXL3  | <i>Lysyl oxidase like 3.</i> This lysyl oxidase likely functions as an amine oxidase and plays a role in the formation of crosslinks in collagens and elastin.                                                                                                                                                                                                                                                                                                                                                                                                                                                                   | Extracellular matrix<br>Lysyl oxidase                   |
| LTBP1  | <i>Latent transforming growth factor beta binding protein 1.</i> The protein belongs to the family of latent TGF-beta binding proteins (LTBPs). The secretion and activation of TGF-beta is regulated by their association with latency-associated proteins and with latent TGF-beta binding proteins. This protein targets latent complexes of transforming growth factor beta to the extracellular matrix, where the latent cytokine is subsequently activated by several different mechanisms.                                                                                                                                | TGFβ                                                    |
| MAN1A1 | <i>Mannosidase alpha class 1A member 1.</i> This class I mammalian Golgi 1,2-mannosidase member is a type II transmembrane protein. It catalyzes the hydrolysis of three terminal mannose residues from peptide-bound Man(9)-GlcNAc(2) oligosaccharides and belongs to family 47 of glycosyl hydrolases.                                                                                                                                                                                                                                                                                                                         | Mannosidase                                             |
| MAPRE1 | <i>Microtubule associated protein RP/EB family member 1.</i> The protein localizes to microtubules, especially the growing ends, in interphase cells. During mitosis, the protein is associated with the centrosomes and spindle microtubules. The protein also associates with components of the dynactin complex and the intermediate chain of cytoplasmic dynein. Because of these associations, it is thought that this protein is involved in the regulation of microtubule structures and chromosome stability.                                                                                                            | Cytoskeleton<br>Microtubule<br>Centrosome<br>Mitosis    |
| MCAM   | <i>Melanoma cell adhesion molecule.</i> The molecule can mediate cell-cell adhesion (PMID 25595133).                                                                                                                                                                                                                                                                                                                                                                                                                                                                                                                             | Adhesion                                                |
| MET    | <i>MET proto-oncogene, receptor tyrosine kinase.</i> This gene encodes a member of the receptor tyrosine kinase family of proteins and the product of the proto-oncogene MET. The encoded preproprotein is proteolytically processed to generate alpha and beta subunits that are linked via disulfide bonds to form the mature receptor. Binding of its ligand, hepatocyte growth factor, induces dimerization and activation of the receptor, which plays a role in cellular survival.                                                                                                                                         | Oncogene<br>HGF                                         |
| MMP1   | <i>Matrix metalloproteinase 1.</i> This member of the peptidase M10 family of matrix metalloproteinases (MMPs); these proteins are involved in the breakdown of extracellular matrix in normal physiological processes. The encoded preproprotein is proteolytically processed to generate the mature protease. This secreted protease breaks down the interstitial collagens, including types I, II, and III.                                                                                                                                                                                                                   | Extracellular protease<br>Collagen                      |
| MMP11  | <i>Matrix metalloproteinase 11.</i> Proteins of the matrix metalloproteinase (MMP) family are involved in the breakdown of extracellular matrix. Most MMPs are secreted as inactive proproteins which are activated when cleaved by extracellular proteinases. However, the enzyme encoded by this gene is activated intracellularly by furin within the constitutive secretory pathway. Also in contrast to other MMPs, this enzyme cleaves alpha 1-proteinase inhibitor but weakly degrades structural proteins of the extracellular matrix.                                                                                   | Extracellular protease                                  |
| MVP    | <i>Major vault protein.</i> This protein is the major component of the vault complex. Vaults are multi-subunit ribonucleoprotein structures that may be involved in nucleo-cytoplasmic transport. The encoded protein may play a role in multiple cellular processes by regulating the MAP kinase, JAK/STAT and phosphoinositide 3-kinase/Akt signaling pathways. The encoded protein also plays a role in multidrug resistance.                                                                                                                                                                                                 | Nucleo-cytoplasmic transport<br>Intracellular signaling |

|         |                                                                                                                                                                                                                                                                                                                                                                                                                                                                                                                                                                                                   |                                                           |
|---------|---------------------------------------------------------------------------------------------------------------------------------------------------------------------------------------------------------------------------------------------------------------------------------------------------------------------------------------------------------------------------------------------------------------------------------------------------------------------------------------------------------------------------------------------------------------------------------------------------|-----------------------------------------------------------|
| NID1    | <i>Nidogen 1</i> . This member of the nidogen family of basement membrane glycoproteins interacts with several other components of basement membranes, and may play a role in cell interactions with the extracellular matrix.                                                                                                                                                                                                                                                                                                                                                                    | Extracellular matrix                                      |
| NRP2    | <i>Neuropilin 2</i> . This member of the neuropilin family of receptor proteins is a transmembrane protein that binds to SEMA3C protein {sema domain, immunoglobulin domain (Ig), short basic domain, secreted, (semaphorin) 3C} and SEMA3F protein {sema domain, immunoglobulin domain (Ig), short basic domain, secreted, (semaphorin) 3F}. It interacts with vascular endothelial growth factor (VEGF). The protein may have a role in angiogenesis.                                                                                                                                           | Semaphorin<br>VEGF<br>Membrane molecule<br>Angiogenesis?  |
| OXCT1   | <i>3-oxoacid CoA-transferase 1</i> . This member of the 3-oxoacid CoA-transferase gene family is a homodimeric mitochondrial matrix enzyme that plays a role in ketone body catabolism.                                                                                                                                                                                                                                                                                                                                                                                                           | Mitochondria<br>Metabolism                                |
| PCDHGC3 | <i>Protocadherin gamma subfamily C, 3</i> . This member of the protocadherin gamma gene cluster has an immunoglobulin-like organization. The gamma gene cluster includes 22 genes divided into 3 subfamilies. Subfamily C contains 3 genes. Each variable region exon encodes the extracellular region, which includes 6 cadherin ectodomains and a transmembrane region. The constant region exons encode the common cytoplasmic region. These neural cadherin-like cell adhesion proteins most likely play a critical role in the establishment and function of specific cell-cell connections. | Adhesion Cell-cell contact                                |
| PCOLCE  | <i>Procollagen C-endopeptidase enhancer</i> . Fibrillar collagen types I-III are synthesized as precursor molecules known as procollagens. These precursors contain amino- and carboxyl-terminal peptide extensions known as N- and C-propeptides, respectively, which are cleaved, upon secretion of procollagen from the cell, to yield the mature triple helical, highly structured fibrils. This encoded glycoprotein binds and drives the enzymatic cleavage of type I procollagen and heightens C-proteinase activity.                                                                      | Extracellular matrix<br>Peptidase<br>Collagen             |
| PLAU    | <i>Plasminogen activator, urokinase</i> . This secreted serine protease converts plasminogen to plasmin.                                                                                                                                                                                                                                                                                                                                                                                                                                                                                          | Coagulation/protease                                      |
| PLTP    | <i>Phospholipid transfer protein</i> . The protein is one of at least two lipid transfer proteins found in human plasma. The encoded protein transfers phospholipids from triglyceride-rich lipoproteins to high density lipoprotein (HDL). In addition to regulating the size of HDL particles, this protein may be involved in cholesterol metabolism.                                                                                                                                                                                                                                          | Lipid metabolism<br>Cholesterol metabolism?               |
| POSTN   | <i>Periostin</i> . This secreted extracellular matrix protein binds to integrins to support adhesion and migration of cells. It plays a role in cancer stem cell maintenance and metastasis.                                                                                                                                                                                                                                                                                                                                                                                                      | Extracellular matrix<br>Integrin<br>Stem cell maintenance |
| PTK7    | <i>Protein tyrosine kinase 7</i> . This receptor protein tyrosine kinase lacks detectable catalytic tyrosine kinase activity, is involved in the Wnt signaling pathway and plays a role in multiple cellular processes including polarity and adhesion.                                                                                                                                                                                                                                                                                                                                           | Tyrosine kinase<br>Wnt signaling<br>Adhesion              |
| RPL30   | <i>Ribosomal protein L30</i> . This ribosomal protein is a component of the 60S subunit. The protein belongs to the L30E family of ribosomal proteins. It is located in the cytoplasm. This gene is co-transcribed with the U72 small nucleolar RNA gene, which is located in its fourth intron.                                                                                                                                                                                                                                                                                                  | Ribosome                                                  |
| RRBP1   | <i>Ribosome binding protein 1</i> . This gene encodes a ribosome-binding protein of the endoplasmic reticulum (ER) membrane. Studies suggest that this gene plays a role in ER proliferation, secretory pathways and secretory cell differentiation, and mediation of ER-microtubule interactions.                                                                                                                                                                                                                                                                                                | Ribosome<br>Endoplasmic reticulum<br>Secretion            |
| SDC1    | <i>Syndecan 1</i> . This transmembrane (type I) heparan sulfate proteoglycan is a member of the syndecan proteoglycan family. The syndecans mediate cell binding, cell signaling, and cytoskeletal organization. The syndecan-1 protein functions as an integral membrane protein and participates in cell proliferation, cell migration and cell-matrix interactions via its receptor for extracellular matrix proteins.                                                                                                                                                                         | Cell surface<br>Extracellular matrix<br>Adhesion          |

|          |                                                                                                                                                                                                                                                                                                                                                                                                                                                                                                                                                                                                                                                                                                                                                                                                                                                                                                                                                                 |                                                                            |
|----------|-----------------------------------------------------------------------------------------------------------------------------------------------------------------------------------------------------------------------------------------------------------------------------------------------------------------------------------------------------------------------------------------------------------------------------------------------------------------------------------------------------------------------------------------------------------------------------------------------------------------------------------------------------------------------------------------------------------------------------------------------------------------------------------------------------------------------------------------------------------------------------------------------------------------------------------------------------------------|----------------------------------------------------------------------------|
| SEMA7A   | <i>Semaphorin 7A</i> . This preproprotein is proteolytically processed to generate the mature glycosylphosphatidylinositol (GPI)-anchored membrane glycoprotein.                                                                                                                                                                                                                                                                                                                                                                                                                                                                                                                                                                                                                                                                                                                                                                                                | Membrane protein                                                           |
| SERPINB7 | <i>Serpin family B member 7</i> . This gene encodes a member of a family of proteins which function as protease inhibitors.                                                                                                                                                                                                                                                                                                                                                                                                                                                                                                                                                                                                                                                                                                                                                                                                                                     | Protease inhibition                                                        |
| SRPX     | <i>Sushi repeat containing protein X-linked</i> . The protein is possibly a peroxiredoxin (PMID 20964819).                                                                                                                                                                                                                                                                                                                                                                                                                                                                                                                                                                                                                                                                                                                                                                                                                                                      | Peroxiredoxin                                                              |
| STC1     | <i>Stanniocalcin 1</i> . This gene encodes a secreted, homodimeric glycoprotein. It is phosphorylated by protein kinase C exclusively on its serine residues. The protein may play a role in the regulation of calcium and phosphate transport, cell metabolism, or cellular calcium/phosphate homeostasis.                                                                                                                                                                                                                                                                                                                                                                                                                                                                                                                                                                                                                                                     | Metabolism<br>Calcium/phosphate homeostasis                                |
| SUMO1    | <i>Small ubiquitin like modifier 1</i> . This protein is a member of the SUMO (small ubiquitin-like modifier) family and functions in a manner similar to ubiquitin in that it is bound to target proteins as part of a post-translational modification system. However, unlike ubiquitin which targets proteins for degradation, this protein is involved in a variety of cellular processes, such as nuclear transport, transcriptional regulation, apoptosis, and protein stability. It is not active until the last four amino acids have been cleaved off.                                                                                                                                                                                                                                                                                                                                                                                                 | Posttranscriptional modification                                           |
| TF       | <i>Transferrin</i> . This glycoprotein transports iron from the intestine, reticuloendothelial system, and liver parenchymal cells to all proliferating cells in the body. This protein may also have a physiologic role as granulocyte/pollen-binding protein (GPBP).                                                                                                                                                                                                                                                                                                                                                                                                                                                                                                                                                                                                                                                                                          | Iron<br>Neutrophil                                                         |
| TGFB1    | <i>Transforming growth factor beta 1</i> . This gene encodes a secreted ligand of the TGF-beta (transforming growth factor-beta) superfamily of proteins. Ligands of this family bind various TGF-beta receptors leading to recruitment and activation of SMAD family transcription factors that regulate gene expression. The encoded preproprotein is proteolytically processed to generate a latency-associated peptide (LAP) and a mature peptide, and is found in either a latent form composed of a mature peptide homodimer, a LAP homodimer, and a latent TGF-beta binding protein, or in an active form consisting solely of the mature peptide homodimer. The mature peptide may also form heterodimers with other TGFB family members. This encoded protein regulates cell proliferation, differentiation and growth, and can modulate expression and activation of other growth factors including interferon gamma and tumor necrosis factor alpha. | TGF<br>TNF<br>IFN<br>Cell proliferation                                    |
| TNC      | <i>Tenacin C</i> . This extracellular matrix protein that contains multiple EGF-like and fibronectin type-III domains. It is implicated in migration.                                                                                                                                                                                                                                                                                                                                                                                                                                                                                                                                                                                                                                                                                                                                                                                                           | Extracellular matrix<br>Migration                                          |
| VAPA     | <i>VAMP associated protein A</i> . The protein is a type IV membrane protein that is present in the plasma membrane and intracellular vesicles. It may also be associated with the cytoskeleton. This protein may function in vesicle trafficking, membrane fusion, protein complex assembly and cell motility.                                                                                                                                                                                                                                                                                                                                                                                                                                                                                                                                                                                                                                                 | Membrane protein<br>Intracellular trafficking<br>Cytoskeleton<br>Secretion |
| VASP     | <i>Vasodilator stimulated phosphoprotein</i> . This is a member of the Ena-VASP protein family that targets to focal adhesions. Their C-terminal EVH2 domain mediates tetramerization and binds both G and F actin. VASP is associated with filamentous actin formation and likely plays a widespread role in cell adhesion and motility. VASP may also be involved in the intracellular signaling pathways that regulate integrin-extracellular matrix interactions.                                                                                                                                                                                                                                                                                                                                                                                                                                                                                           | Adhesion<br>Actin<br>Integrin-extracellular matrix                         |



**Table S8.** A list of proteins showing significantly increased levels in osteoblasts compared with MSCs. The protein levels were determined in the culture supernatants of *in vitro* cultured cells. The table includes (i) proteins showing detectable levels in at least three osteoblast and three MSC populations and differing significantly based on *p*-values (<0.05) and Fold Change (FC, *p*<0.05); and (ii) proteins detected for  $\geq 7$  osteoblast and  $\leq 1$  MSC populations. A total of 36 proteins were identified.

| PROTEIN NAME                                                           | GENE ID     |
|------------------------------------------------------------------------|-------------|
| Aggrecan core protein;Aggrecan core protein 2                          | ACAN        |
| Adenosylhomocysteinase                                                 | AHCY        |
| Apolipoprotein C-III                                                   | APOC3       |
| Apoptosis regulator BAX                                                | BAX         |
| Complement C3                                                          | C3          |
| Protein canopy homolog 2                                               | CNPY2       |
| Collagen alpha-1(II) chain;Collagen alpha-1(II) chain;Chondrocalcin    | COL2A1      |
| Lysosomal protective protein                                           | CTSA        |
| Cathepsin D;Cathepsin D light chain;Cathepsin D heavy chain            | CTSD        |
| EGF-containing fibulin-like extracellular matrix protein 1             | EFEMP1      |
| Elastin                                                                | ELN         |
| Coagulation factor X                                                   | F10         |
| Hemoglobin subunit alpha                                               | HBA1        |
| Heat shock 70 kDa protein 6;Putative heat shock 70 kDa protein 7       | HSPA6;HSPA7 |
| Insulin-like growth factor-binding protein complex acid labile subunit | IGFALS      |
| Insulin-like growth factor-binding protein 3                           | IGFBP3      |
| Laminin subunit beta-2                                                 | LAMB2       |
| Galectin-3-binding protein                                             | LGALS3BP    |
| Metallothionein-2                                                      | MT2A        |
| Matrix-remodeling-associated protein 5                                 | MXRA5       |
| Myosin-14                                                              | MYH14       |
| Neuroblastoma suppressor of tumorigenicity 1                           | NBL1        |
| Proenkephalin-A                                                        | PENK        |
| Podocan                                                                | PODN        |
| Proteasome subunit beta type-8                                         | PSMB8       |
| Parathyrosin                                                           | PTMS        |
| Ras-related protein Rab-7a                                             | RAB7A       |
| CapZ-interacting protein                                               | RCSD1       |
| Signal peptide, CUB and EGF-like domain-containing protein 3           | SCUBE3      |
| Syntenin-1                                                             | SDCBP       |
| Selenoprotein P                                                        | SEPP1       |
| Plasma protease C1 inhibitor                                           | SERPING1    |
| Small ubiquitin-related modifier 2                                     | SUMO2       |
| Thrombospondin-4                                                       | THBS4       |
| Testis-specific serine/threonine-protein kinase 4                      | TSSK4       |
| Pantetheinase                                                          | VNN1        |

**Table S9.** Proteins showing increased constitutive release by *in vitro* cultured human osteoblasts. The table lists the proteins showing significantly increased levels in osteoblasts compared with MSCs. The table includes (i) proteins showing detectable levels in at least three osteoblast and three MSC populations and differing significantly based on *p*-values (<0.05) and Fold Change (FC, *p*<0.05); and (ii) proteins detected for  $\geq 7$  osteoblast and  $\leq 1$  MSC populations. We identified 36 peptides derived from 36 proteins. The table presents the protein identity (i.e. encoding gene), a brief description of the encoded protein and key words describing important structure/function of the protein. The information is based on the Gene database and selected references from the PubMed database. **Yellow** background color indicates extracellular matrix molecules, **green** color adhesion molecules and **blue** color proteases.

| IDENTITY | SUMMARY                                                                                                                                                                                                                                                                                                                                                                                                                                                                                | KEY WORDS                             |
|----------|----------------------------------------------------------------------------------------------------------------------------------------------------------------------------------------------------------------------------------------------------------------------------------------------------------------------------------------------------------------------------------------------------------------------------------------------------------------------------------------|---------------------------------------|
| ACAN     | <i>Aggrecan</i> . This protein is a member of the aggrecan/versican proteoglycan family and a part of the extracellular matrix.                                                                                                                                                                                                                                                                                                                                                        | Extracellular matrix                  |
| AHCY     | <i>Adenosylhomocysteinase</i> . S-adenosylhomocysteine hydrolase belongs to the adenosylhomocysteinase family and catalyzes the reversible hydrolysis of S-adenosylhomocysteine (AdoHcy) to adenosine (Ado) and L-homocysteine (Hcy). Thus, it regulates the intracellular S-adenosylhomocysteine (SAH) concentration thought to be important for transmethylation reactions.                                                                                                          | Metabolism<br>Homocystein<br>Adenosin |
| APOC3    | <i>Apolipoprotein C3</i> . This protein is a component of triglyceride (TG)-rich lipoproteins (TRLs) including very low density lipoproteins (VLDL), high density lipoproteins (HDL) and chylomicrons. The encoded protein plays a role in the metabolism of these TRLs through multiple modes.                                                                                                                                                                                        | Lipid metabolism                      |
| BAX      | <i>BCL2 associated X, apoptosis regulator</i> . This BCL2 family protein and forms a heterodimer with BCL2; it thereby functions as an apoptotic activator. It interacts with, and increase the opening of, the mitochondrial voltage-dependent anion channel (VDAC), which leads to the loss in membrane potential and the release of cytochrome c. The expression of this gene is regulated by the tumor suppressor p53 and has been shown to be involved in p53-mediated apoptosis. | Proapoptotic<br>p53                   |
| C3       | <i>Complement factor C3</i> . Complement component C3 plays a central role in the activation of complement system. Its activation is required for both classical and alternative complement activation pathways. The encoded preproprotein is proteolytically processed to generate alpha and beta subunits that form the mature protein. The C3a peptide modulates inflammation                                                                                                       | Complement<br>Inflammation            |
| CNPY2    | <i>Canopy FGF signaling regulator 2</i> .                                                                                                                                                                                                                                                                                                                                                                                                                                              | Cytokine signaling                    |
| COL2A1   | <i>Collagen type II alpha 1 chain</i> . This gene encodes the alpha-1 chain of type II collagen, a fibrillar collagen found.                                                                                                                                                                                                                                                                                                                                                           | Extracellular matrix                  |
| CTSA     | <i>Cathepsin A</i> . This member of the peptidase S10 family of serine carboxypeptidases. This enzyme possesses deamidase, esterase and carboxypeptidase activities and acts as a scaffold in the lysosomal multienzyme complex.                                                                                                                                                                                                                                                       | Peptidase, lysosome                   |
| CTSD     | <i>Cathepsin D</i> . This gene encodes a member of the A1 family of peptidases. The encoded preproprotein is proteolytically processed to generate cathepsin D light and heavy chains, which heterodimerize to form the mature enzyme. This enzyme exhibits pepsin-like activity.                                                                                                                                                                                                      | Peptidase                             |
| EFEMP1   | <i>EGF containing fibulin extracellular matrix protein 1</i> . This protein is a member of the fibulin family of extracellular matrix glycoproteins. This gene is upregulated in malignant gliomas and may play a role in the aggressive nature of these tumors.                                                                                                                                                                                                                       | Extracellular matrix<br>Cancer        |
| ELN      | <i>Elastin</i> . This encoded protein is one of the two components of elastic fibers. Elastic fibers comprise part of the extracellular matrix. Degradation products of the encoded protein, known as elastin-derived peptides or elastokines, bind the elastin receptor complex and other receptors and stimulate migration and proliferation and can also contribute to cancer progression.                                                                                          | Extracellular matrix                  |

|                         |                                                                                                                                                                                                                                                                                                                                                                                                                                                                                                                                                                                                                                                                                                                                                                   |                                                           |
|-------------------------|-------------------------------------------------------------------------------------------------------------------------------------------------------------------------------------------------------------------------------------------------------------------------------------------------------------------------------------------------------------------------------------------------------------------------------------------------------------------------------------------------------------------------------------------------------------------------------------------------------------------------------------------------------------------------------------------------------------------------------------------------------------------|-----------------------------------------------------------|
| F10                     | <i>Coagulation factor X</i> . This gene encodes the vitamin K-dependent coagulation factor X of the blood coagulation cascade.                                                                                                                                                                                                                                                                                                                                                                                                                                                                                                                                                                                                                                    | Coagulation                                               |
| HBA1                    | <i>Hemoglobin subunit alpha 1</i> . Two alpha chains plus two beta chains constitute HbA, which in normal adult life comprises about 97% of the total hemoglobin; alpha chains combine with delta chains to constitute HbA-2, which with HbF (fetal hemoglobin) makes up the remaining 3% of adult hemoglobin.                                                                                                                                                                                                                                                                                                                                                                                                                                                    | Erythrocyte                                               |
| HSPA6                   | <i>Heat shock protein family A (Hsp70) member 6</i> .                                                                                                                                                                                                                                                                                                                                                                                                                                                                                                                                                                                                                                                                                                             | Chaperone                                                 |
| IGFALS                  | <i>Insulin like growth factor binding protein acid labile subunit</i> . This serum protein binds insulin-like growth factors, increasing their half-life and their vascular localization.                                                                                                                                                                                                                                                                                                                                                                                                                                                                                                                                                                         | IGF<br>Plasma protein                                     |
| IGFBP3                  | <i>Insulin like growth factor binding protein 3</i> . This insulin-like growth factor binding protein (IGFBP) forms a complex with the insulin-like growth factor acid-labile subunit (IGFALS) and either insulin-like growth factor (IGF) I or II. In this form, it circulates in the plasma, prolonging the half-life of IGFs and altering their interaction with cell surface receptors.                                                                                                                                                                                                                                                                                                                                                                       | IGF<br>Plasma protein                                     |
| LAMB2                   | <i>Laminin subunit beta 2</i> . Laminins are a family of extracellular matrix glycoproteins, and are the major noncollagenous constituent of basement membranes. Laminins, composed of 3 non identical chains: laminin alpha, beta and gamma (formerly A, B1, and B2, respectively), form a cruciform structure consisting of 3 short arms, each formed by a different chain, and a long arm composed of all 3 chains. Different alpha, beta and gamma chain isomers combine to give rise to different heterotrimeric laminin isoforms which are designated by Arabic numerals. This gene encodes the beta chain isoform laminin, beta 2. The beta 2 chain contains the 7 structural domains typical of beta chains of laminin, including the short alpha region. | Extracellular matrix                                      |
| LGALS3BP                | <i>Galectin 3 binding protein</i> . The galectins are a family of beta-galactoside-binding proteins implicated in modulating cell-cell and cell-matrix interactions. LGALS3BP has been found elevated in the serum of patients with cancer. It appears to be implicated in immune responses associated with natural killer and lymphokine-activated killer cell cytotoxicity. The native protein binds specifically to a human macrophage-associated lectin known as Mac-2 and also binds galectin 1.                                                                                                                                                                                                                                                             | Extracellular matrix<br>Cell adhesion<br>Monocyte (Mac-1) |
| MT2A;MT1X;<br>MT1G;MT1M | <i>Metallothionein 2A</i> . This gene is a member of the metallothionein family of genes; these proteins bind divalent heavy metal ions and alter intracellular concentration of heavy metals. These proteins act as anti-oxidants, protect against hydroxyl free radicals, are important in homeostatic control of metal in the cell, and play a role in detoxification of heavy metals. The encoded protein interacts with the protein encoded by the homeobox containing 1 gene in some cell types, controlling intracellular zinc levels, affecting apoptotic and autophagy pathways.                                                                                                                                                                         | Anti-oxidant<br>Apoptosis                                 |
| MXRA5                   | <i>Matrix remodeling associated 5</i> . This matrix-remodelling associated protein contains 7 leucine-rich repeats and 12 immunoglobulin-like C2-type domains related to perlecan.                                                                                                                                                                                                                                                                                                                                                                                                                                                                                                                                                                                | Extracellular matrix                                      |
| MYH14                   | <i>Myosin heavy chain 14</i> . This gene encodes a member of the myosin superfamily. The protein represents a conventional non-muscle myosin. Myosins are actin-dependent motor proteins with diverse functions including regulation of cytokinesis, cell motility, and cell polarity.                                                                                                                                                                                                                                                                                                                                                                                                                                                                            | Cytoskeleton<br>Actin                                     |
| NBL1                    | <i>NBL1, DAN family BMP antagonist</i> . This protein is the founding member of the evolutionarily conserved CAN (Cerberus and DAN) family of proteins. These proteins are secreted, and act as BMP (bone morphogenetic protein) antagonists by binding to BMPs and preventing them from interacting with their receptors.                                                                                                                                                                                                                                                                                                                                                                                                                                        | BMP antagonist<br>Extracellular                           |
| PENK                    | <i>Preproenkephalin</i> . This preproprotein is proteolytically processed to generate multiple protein products.                                                                                                                                                                                                                                                                                                                                                                                                                                                                                                                                                                                                                                                  | Extracellular                                             |
| PODN                    | <i>Podocan</i> . The protein is a member of the small leucine-rich repeat protein family and contains an amino terminal CX3CXCX7C cysteine-rich cluster followed by a leucine-rich repeat domain. Studies suggest that this protein could function to inhibit proliferation and migration. Podocan regulates Wnt/ $\beta$ -catenin through Wnt4 to promote MDSC differentiation (PMID 31447699).                                                                                                                                                                                                                                                                                                                                                                  | Migration?<br>Wnt/ $\beta$ -catenin                       |

|          |                                                                                                                                                                                                                                                                                                                                                                                                                                                                |                                                                       |
|----------|----------------------------------------------------------------------------------------------------------------------------------------------------------------------------------------------------------------------------------------------------------------------------------------------------------------------------------------------------------------------------------------------------------------------------------------------------------------|-----------------------------------------------------------------------|
| PSMB8    | <i>Proteasome 20S subunit beta 8</i> . The proteasome is a multicatalytic proteinase complex. This protein is a member of the proteasome B-type family, also known as the T1B family. Proteolytic processing is required to generate a mature subunit.                                                                                                                                                                                                         | Proteasome                                                            |
| PTMS     | <i>Parathyromosin</i> . It is possibly a regulator of transcription and proliferation (PMID 29541218).                                                                                                                                                                                                                                                                                                                                                         | Transcription?                                                        |
| RAB7A    | <i>RAB7A, member RAS oncogene family</i> . RAB family members are small, RAS-related GTP-binding proteins that are important regulators of vesicular transport. Each RAB protein targets multiple proteins that act in exocytic / endocytic pathways. This protein regulates vesicle traffic in the late endosomes and also from late endosomes to lysosomes.                                                                                                  | GTB binding<br>Vesicular transport<br>Exocytosis/endocytosis          |
| RCSD1    | RCSD domain containing 1. The protein is a regulator of Wnt signaling.                                                                                                                                                                                                                                                                                                                                                                                         | Intracellular signaling                                               |
| SCUBE3   | <i>Signal peptide, CUB domain and EGF like domain containing 3</i> . This signal peptide is upregulated in lung cancer tumor tissue compared to healthy tissue and is associated with loss of the epithelial marker E-cadherin and with increased expression of vimentin. It is also a transforming growth factor beta receptor ligand. Both the full length protein and C-terminal fragment can bind to the transforming growth factor beta type II receptor. | Cadherin<br>Vimentin<br>TGFβ                                          |
| SDCBP    | <i>Syndecan binding protein</i> . The protein was initially identified as a molecule linking syndecan-mediated signaling to the cytoskeleton. It may also affect cytoskeletal-membrane organization, cell adhesion, protein trafficking, and the activation of transcription factors. The protein is primarily localized to membrane-associated adherens junctions and focal adhesions but is also found at the endoplasmic reticulum and nucleus.             | Cytoskeleton<br>Adhesion<br>Intracellular transport<br>Transcription? |
| SEPP1    | <i>Selenoprotein P</i> . A selenoprotein that is predominantly secreted into the plasma. It is unique in that it contains multiple selenocysteine (Sec) residues per polypeptide (10 in human), and accounts for most of the selenium in plasma. It has been implicated as an extracellular antioxidant, and in the transport of selenium to extra-hepatic tissues via apolipoprotein E receptor-2 (apoER2).                                                   | Extracellular<br>Transport<br>Antioxidant                             |
| SERPING1 | <i>Serpin family G member 1</i> . This highly glycosylated plasma protein is involved in the regulation of the complement cascade. Its encoded protein, C1 inhibitor, inhibits activated C1r and C1s of the first complement component and thus regulates complement activation.                                                                                                                                                                               | Complement inhibition                                                 |
| SUMO2    | <i>Small ubiquitin like modifier 2</i> . This protein is a member of the SUMO (small ubiquitin-like modifier) protein family. It is bound to target proteins as part of a post-translational modification system. However, unlike ubiquitin which targets proteins for degradation, this protein is involved in a variety of cellular processes, such as nuclear transport, transcriptional regulation, apoptosis, and protein stability.                      | Protein modulation                                                    |
| THBS4    | <i>Thrombospondin 4</i> . The protein belongs to the thrombospondin protein family; a family of adhesive glycoproteins that mediate cell-to-cell and cell-to-matrix interactions.                                                                                                                                                                                                                                                                              | Adhesion<br>Cell-matrix, cell-cell                                    |
| TSSK4    | <i>Testis specific serine kinase 4</i> . This testis-specific serine/threonine kinase family member is thought to stimulate the CREB/CRE responsive pathway through phosphorylation of the cAMP responsive element binding protein transcription factor.                                                                                                                                                                                                       | CREB<br>Transcription                                                 |
| VNN1     | <i>Vanin 1</i> . This member of the vanin protein family is likely a GPI-anchored cell surface molecule.                                                                                                                                                                                                                                                                                                                                                       | Cell surface molecule                                                 |

**Table S10.** A comparison of the constitutive extracellular protein release by human MSCs and osteoblasts; a summary of the proteins with significantly increased release by MSCs. The table presents the GO terms (identity/name) the number (number of proteins included/number of different proteins) and percentage of included proteins (number of proteins in the term/number of proteins included in the analysis, the corresponding percentage), the *p*-value and the false discovery rate (FDR). The GO analysis was performed using aGOTool (Main classification: Extracellular matrix, adhesion and proteases).

| GO term                   |                                              | Numbers<br>(percent) | <i>p</i> - value | FDR      |
|---------------------------|----------------------------------------------|----------------------|------------------|----------|
| <b>Biological process</b> |                                              |                      |                  |          |
| ...GO:0043062             | Extracellular structure organization         | 47/185 (25.4)        | 4.70E-10         | 1.81E-06 |
| .GO:0032502               | Developmental process                        | 105/185 (56.8)       | 1.18E-07         | 0.000151 |
| ..GO:0007155              | Cell adhesion                                | 46/185 (24.9)        | 9.79E-07         | 0.000944 |
| ...GO:0030574             | Collagen catabolic process                   | 19/185 (10.3)        | 1.78E-06         | 0.00137  |
| ....GO:0051093            | Negative regulation of developmental process | 32/185 (17.3)        | 1.22E-05         | 0.00524  |
| ....GO:0010810            | Regulation of cell-substrate adhesion        | 20/185 (10.8)        | 2.33E-05         | 0.00898  |
| ....GO:0030334            | Regulation of cell migration                 | 37/185 (20.0)        | 3.22E-05         | 0.0104   |
| ....GO:0051960            | Regulation of nervous system development     | 26/185 (14.1)        | 6.32E-05         | 0.0174   |
| ...GO:0045595             | Regulation of cell differentiation           | 49/185 (26.5)        | 8.05E-05         | 0.0187   |
| <b>Cell compartment</b>   |                                              |                      |                  |          |
| ..GO:0031012              | Extracellular matrix                         | 66/185 (35.7)        | 5.36E-11         | 2.51E-08 |
| ..GO:0005615              | Extracellular space                          | 77/185 (41.6)        | 3.53E-09         | 8.26E-07 |
| ..GO:0044420              | Extracellular matrix component               | 27/185 (15.0)        | 1.01E-07         | 1.58E-05 |
| ...GO:0005581             | Collagen trimer                              | 19/185 (10.3)        | 1.59E-07         | 1.86E-05 |
| ....GO:0005788            | Endoplasmic reticulum lumen                  | 37/185 (20.0)        | 9.74E-07         | 9.12E-05 |
| .GO:0005576               | Extracellular region                         | 81/185 (43.8)        | 1.46E-06         | 0.000114 |
| ..GO:0009986              | Cell surface                                 | 29/185 (15.7)        | 4.67E-05         | 0.00243  |
| <b>Uniprot</b>            |                                              |                      |                  |          |
| .UPK:0732                 | Signal                                       | 103/188 (54.8)       | 1.14E-11         | 3.30E-09 |
| .UPK:0964                 | Secreted                                     | 81/188 (43.1)        | 2.89E-10         | 4.17E-08 |
| ..UPK:0272                | Extracellular matrix                         | 41/188 (21.8)        | 4.63E-10         | 4.46E-08 |
| .UPK:0325                 | Glycoprotein                                 | 101/188 (53.7)       | 6.92E-10         | 5.00E-08 |
| .UPK:0176                 | Collagen                                     | 19/188 (10.1)        | 4.71E-08         | 2.72E-06 |
| .UPK:1015                 | Disulfide bond                               | 86/188 (45.7)        | 2.63E-07         | 1.27E-05 |
| .UPK:0130                 | Cell adhesion                                | 30/188 (16.0)        | 7.38E-06         | 0.000305 |
| .UPK:0379                 | Hydroxylation                                | 20/188 (10.6)        | 2.63E-05         | 0.00095  |
| UPK:9994                  | Domain                                       | 138/188 (73.4)       | 7.12E-05         | 0.00229  |
| .UPK:0677                 | Repeat                                       | 85/188 (45.2)        | 0.000164         | 0.00474  |
| .UPK:0106                 | Calcium                                      | 35/188 (18.6)        | 0.00026          | 0.00683  |
| .UPK:0621                 | Polymorphism                                 | 136/188 (72.3)       | 0.000295         | 0.0071   |
| .UPK:0358                 | Heparin-binding                              | 12/188 (6.4)         | 0.00157          | 0.035    |
| <b>KEGG</b>               |                                              |                      |                  |          |
| KEGG:04974                | Protein digestion and absorption             | 13/93 (14.0)         | 1.69E-05         | 0.00176  |
| KEGG:04512                | ECM-receptor interaction                     | 17/93 (18.3)         | 2.25E-05         | 0.00176  |
| KEGG:04510                | Focal adhesion                               | 20/93 (21.5)         | 0.000124         | 0.00431  |
| KEGG:05146                | Amoebiasis                                   | 13/93 (14.0)         | 0.000855         | 0.0222   |

**Table S11.** MSC or osteoblast proteins included in the network Platelet degranulation (Figure 3). Green color indicates proteins that are increased in osteoblasts. The summary is based on the Gene database.

| IDENTITY | DESCRIPTION                                                                                                                                                                                                                                                                                                                                                                                                                                                                                                                                                                                                               | KEY WORDS                                                 |
|----------|---------------------------------------------------------------------------------------------------------------------------------------------------------------------------------------------------------------------------------------------------------------------------------------------------------------------------------------------------------------------------------------------------------------------------------------------------------------------------------------------------------------------------------------------------------------------------------------------------------------------------|-----------------------------------------------------------|
| ALDOA    | <i>Aldolase, fructose-bisphosphate A</i> . This member of the class I fructose-bisphosphate aldolase protein family is glycolytic enzyme that catalyzes the reversible conversion of fructose-1,6-bisphosphate to glyceraldehyde 3-phosphate and dihydroxyacetone phosphate. Mutations in this gene have been associated with Glycogen Storage Disease XII, an autosomal recessive disorder associated with hemolytic anemia. Disruption of this gene also plays a role in the progression of multiple types of cancers. The gene shows high expression in several tissues including bone marrow, spleen and lymph nodes. | Metabolism<br>Hemolytic anemia<br>Cancer                  |
| APOC3    | <i>Apolipoprotein C3</i> . This gene encodes a protein component of triglyceride (TG)-rich lipoproteins (TRLs) including very low density lipoproteins (VLDL), high density lipoproteins (HDL) and chylomicrons. The encoded protein plays a role in triglyceride metabolism.                                                                                                                                                                                                                                                                                                                                             | Metabolism                                                |
| APP      | <i>Amyloid beta precursor protein</i> . This cell surface receptor and transmembrane precursor protein is cleaved by secretases to form a number of peptides. Some of these peptides are secreted and can bind to the acetyltransferase complex APBB1/TIP60 to promote transcriptional activation, while others form the protein basis of amyloid plaques. It is expressed in a wide range of organs/tissues, including bone marrow, lymph nodes and spleen.                                                                                                                                                              | Cell surface<br>Transmembrane<br>protein<br>Transcription |
| CLU      | <i>Clusterin</i> . The protein is a secreted chaperone that also can be detected in the cell cytosol. It has been suggested to be involved in several basic biological events such as cell death and tumor progression. It is expressed in several organs/tissues with low expression in normal bone marrow/spleen but shows higher expression in the lymph nodes.                                                                                                                                                                                                                                                        | Chaperone<br>Extracellular<br>Cancer                      |
| ENO1     | <i>Enolase 1</i> . This gene encodes alpha-enolase that functions as a glycolytic enzyme. Alternative splicing of this gene results in a shorter isoform that has been shown to bind to the c-myc promoter and function as a tumor suppressor. The gene shows high expression in several tissues including bone marrow, spleen and lymph nodes.                                                                                                                                                                                                                                                                           | Metabolism<br>Glycolytic enzyme<br>Tumor suppressor       |
| FN1      | <i>Fibronectin 1</i> . Fibronectin is a glycoprotein present in a soluble dimeric form in plasma, and in a dimeric or multimeric form at the cell surface and in extracellular matrix. The encoded preproprotein is proteolytically processed to generate the mature protein. Fibronectin is involved in cell adhesion and migration processes including embryogenesis, wound healing, blood coagulation, host defense, and metastasis. Low expression of this gene is seen in both normal bone marrow and lymphoid organs.                                                                                               | Extracellular matrix<br>Cell migration                    |
| GAS6     | <i>Growth arrest specific 6</i> . This gamma-carboxyglutamic acid (Gla)-containing protein is thought to be involved in the stimulation of cell proliferation; the gene is frequently overexpressed in many cancers and has been implicated as an adverse prognostic marker. The gene is expressed in many organs, but the expression in normal bone marrow is low.                                                                                                                                                                                                                                                       | Cell proliferation<br>Cancer                              |
| GPC1     | <i>Glypican 1</i> . Cell surface heparan sulfate proteoglycans are composed of a membrane-associated protein core substituted with a variable number of heparan sulfate chains. Members of the glypican-related integral membrane proteoglycan family contain a core protein anchored to the cytoplasmic membrane via a glycosyl phosphatidylinositol linkage. These proteins may play a role in the control of cell division and growth regulation. The expression in normal bone marrow is low.                                                                                                                         | Cell surface<br>Growth regulation                         |
| LRP1     | <i>LDL receptor related protein 1</i> . This gene encodes a member of the low-density lipoprotein receptor family of proteins. The encoded preproprotein is proteolytically processed. This receptor is involved in several cellular processes, including intracellular signaling, lipid homeostasis, and clearance of apoptotic cells. The gene shows low expression in normal bone                                                                                                                                                                                                                                      | Lipid metabolism                                          |

|          |                                                                                                                                                                                                                                                                                                                                                                                                                                                                                                                                                                                               |                                                                    |
|----------|-----------------------------------------------------------------------------------------------------------------------------------------------------------------------------------------------------------------------------------------------------------------------------------------------------------------------------------------------------------------------------------------------------------------------------------------------------------------------------------------------------------------------------------------------------------------------------------------------|--------------------------------------------------------------------|
|          | marrow, spleen and lymph nodes.                                                                                                                                                                                                                                                                                                                                                                                                                                                                                                                                                               |                                                                    |
| PLAU     | <i>Plasminogen activator urokinase</i> . This gene encodes a secreted serine protease that converts plasminogen to plasmin. The encoded preproprotein is proteolytically processed to generate A and B polypeptide chains. The gene is expressed in many tissues/organs, including normal bone marrow.                                                                                                                                                                                                                                                                                        | Protease<br>Coagulation                                            |
| PLTP     | <i>Phospholipid transfer protein</i> . The encoded protein is one of at least two lipid transfer proteins found in human plasma. It transfers phospholipids from triglyceride-rich lipoproteins to high density lipoprotein (HDL). In addition to regulating the size of HDL particles, this protein may be involved in cholesterol metabolism. The gene is expressed in many organs/tissues.                                                                                                                                                                                                 | Lipid metabolism                                                   |
| SERPINE1 | Serpin family E member 1. This serine proteinase inhibitor is the principal inhibitor of tissue plasminogen activator (tPA) and urokinase (uPA). It has low expression in many organs/tissues, also normal bone marrow and lymph nodes/spleen.                                                                                                                                                                                                                                                                                                                                                | Serine protease inhibitor                                          |
| SERPING1 | <i>Serpin family G member 1</i> . This highly glycosylated protein inhibits activated C1r and C1s of the first complement component and thus regulates complement activation.                                                                                                                                                                                                                                                                                                                                                                                                                 | Complement inhibition                                              |
| SRGN     | <i>Serglycin</i> . This protein is a hematopoietic cell granule proteoglycan. Proteoglycans stored in the secretory granules of many hematopoietic cells also contain a protease-resistant peptide core, which may be important for neutralizing hydrolytic enzymes. This encoded protein is associated with the macromolecular complex of granzymes and perforin. The gene is highly expressed in normal bone marrow, higher than in many other organs/tissues.                                                                                                                              | Secretory granules                                                 |
| TGFB1    | <i>Transforming growth factor beta 1</i> . This cytokine binds various TGF-beta receptors leading to recruitment and activation of SMAD family transcription factors that regulate gene expression. The encoded preproprotein is proteolytically processed. The mature peptide may form heterodimers with other TGFB family members. This encoded protein regulates cell proliferation, differentiation and growth, and can modulate expression and activation of other growth factors including interferon gamma and tumor necrosis factor alpha. It is expressed in several tissues/organs. | Cytokine                                                           |
| THBS1    | <i>Thrombospondin 1</i> . The protein is a subunit of a disulfide-linked homotrimeric protein. It is an adhesive glycoprotein that mediates cell-to-cell and cell-to-matrix interactions. This protein can bind to fibrinogen, fibronectin, laminin, type V collagen and integrins alpha-V/beta-1, and it has roles in platelet aggregation, angiogenesis, and tumorigenesis. The gene is expressed in many organs/tissues, including normal bone marrow, spleen and lymph nodes.                                                                                                             | Platelet aggregation<br>Adhesion<br>Angiogenesis<br>Carcinogenesis |

**Table S12.** Proteins showing significantly different release by osteoblasts derived from male and female donors. Positive FC values (red color) indicate higher levels in female donors, negative FC (blue color) indicates higher levels in male donors. The table presents the gene identity/name, fold change (FC) and the p-value for the Welch's T-test.

| Gene     | Fold change | p-value    |
|----------|-------------|------------|
| COL12A1  | 3,9172      | 0,00583214 |
| ADM      | 3,56355     | 0,0113848  |
| ALCAM    | 3,50705     | 0,0439449  |
| AEBP1    | 3,21815     | 0,00991128 |
| NPC2     | 3,05285     | 0,00237781 |
| CLU      | 3,0483      | 0,0107678  |
| ECM1     | 2,9865      | 0,00273242 |
| GREM1    | 2,8583      | 0,0111503  |
| IGFBP3   | 2,8274      | 0,0146121  |
| ATP6AP1  | 2,77635     | 0,0471022  |
| SPOCK1   | 2,65585     | 0,0198271  |
| CTSB     | 2,64075     | 0,00447139 |
| FAM3C    | 2,62215     | 0,0333052  |
| CLEC3B   | 2,5564      | 0,0352516  |
| EFEMP2   | 2,5213      | 0,0207342  |
| PSAP     | 2,4455      | 0,0195447  |
| CSTB     | 2,4262      | 0,0357297  |
| CTSA     | 2,41495     | 0,0218968  |
| CTGF     | 2,4117      | 0,0231387  |
| COL3A1   | 2,3762      | 0,0153434  |
| BLMH     | 2,30145     | 0,0317783  |
| GOLM1    | 2,2475      | 0,0197072  |
| CD248    | 2,162       | 0,00997178 |
| CD109    | 2,12685     | 0,0487072  |
| THBS2    | 2,026       | 0,0317175  |
| MARCKS   | 1,97045     | 0,039555   |
| LOXL2    | 1,96725     | 0,0327348  |
| CST3     | 1,79495     | 0,0428307  |
| CLEC11A  | 1,78445     | 0,00510302 |
| C1R      | 1,7734      | 0,013496   |
| TIMP2    | 1,73575     | 0,013516   |
| PTGDS    | 1,72685     | 0,0145427  |
| CTSL     | 1,68405     | 0,0381368  |
| TIMP1    | 1,61435     | 0,0238989  |
| CYR61    | 1,55095     | 0,00171851 |
| PCOLCE   | 1,5505      | 0,0236346  |
| FSTL1    | 1,3911      | 0,0304739  |
| LGALS3BP | 1,3438      | 0,0226022  |
| NUCB1    | 0,9058      | 0,0446702  |
| HNRNPA3  | -1,3532     | 0,0265133  |



|          |          |           |
|----------|----------|-----------|
| CMPK1    | -1,447   | 0,0363437 |
| C3       | -1,6425  | 0,0226989 |
| F10      | -1,96495 | 0,0332557 |
| AIFM1    | -2,14105 | 0,0361654 |
| GALNT10  | -2,20535 | 0,0309268 |
| DDAH2    | -2,24845 | 0,0192639 |
| HBA1     | -2,90705 | 0,0155052 |
| HIST1H1E | -2,9644  | 0,011088  |

**Table S13.** Expression of proteins included in the GO term exosomes by human MSCs and osteoblasts. The proteins are listed in alphabetic order based on their gene identity. Proteins only expressed by MSCs are colored in blue whereas proteins expressed only by osteoblasts are colored in green. Proteins belonging to the 100 top-ranked exosomal proteins ([http://exocarta.org/exosome\\_markers\\_new](http://exocarta.org/exosome_markers_new)) are written in red, the top-25 ranked are in addition marked in bold.

|              |                 |               |              |                    |               |              |
|--------------|-----------------|---------------|--------------|--------------------|---------------|--------------|
| ABHD14B      | APOA1BP         | <b>BPI</b>    | <b>CDC42</b> | CSTB               | EIF3I         | <b>GALNS</b> |
| <b>ACAT2</b> | APOB            | <b>BSG</b>    | CDH11        | CTSA               | EIF4A1        | GANAB        |
| <b>ACLY</b>  | APOC3           | BTD           | CDH13        | CTSB               | EIF6          | <b>GAPDH</b> |
| <b>ACTB</b>  | APOE            | C1R           | CFB          | <b>CTSC</b>        | <b>ELANE</b>  | GARS         |
| ACTBL2       | APP             | C2            | CFD          | CTSD               | ELAVL1        | GAS6         |
| ACTC1        | APRT            | C3            | CFH          | <b>CTSF</b>        | EMILIN1       | GBA          |
| <b>ACTG1</b> | <b>ARF1</b>     | C4A           | CFI          | CTSG               | <b>ENO1</b>   | GBE1         |
| ACTN1        | ARF4            | <b>C4B</b>    | <b>CFL1</b>  | CTSL               | ENO2          | <b>GDI2</b>  |
| <b>ACTN4</b> | ARHGAP1         | CA1           | CFL2         | CTSZ               | ERAP1         | GGCT         |
| ACTR1A       | ARHGDI1A        | CA2           | CH13L1       | CUTA               | ERP44         | GGH          |
| ACTR2        | ARHGDI1B        | <b>CAB39</b>  | <b>CHID1</b> | DAG1               | <b>ESD</b>    | GLO1         |
| ACTR3        | <b>ARL3</b>     | CACNA2D1      | CLEC3B       | DBI                | EXT2          | GLOD4        |
| ADAM10       | ARPC1A          | CACYBP        | <b>CLIC1</b> | DBNL               | <b>EZR</b>    | GLRX         |
| ADAM9        | ARPC1B          | CAD           | CLIC4        | DCD                | FABP1         | GM2A         |
| ADH5         | ARPC2           | CALR          | <b>CLTC</b>  | DCPS               | <b>FABP3</b>  | <b>GNAI2</b> |
| AEBP1        | ARPC3           | CAND1         | CLU          | DCTN2              | FABP5         | <b>GNB1</b>  |
| AGRN         | ARPC4           | CANT1         | CMPK1        | DDAH1              | FAH           | <b>GNB2</b>  |
| <b>AGT</b>   | <b>ARPC5</b>    | CANX          | CNDP2        | DDAH2              | FAM129B       | GNB2L1       |
| <b>AHCY</b>  | <b>ARSA</b>     | CAP1          | <b>CNTN1</b> | DDB1               | <b>FAM20C</b> | GNPDA1       |
| AHNAK        | <b>ASAH1</b>    | CAPG          | COL1A2       | DDT                | FAM3C         | GNPTG        |
| AHSA1        | ATIC            | CAPN1         | COL4A2       | <b>DEFA3;DEFA1</b> | FAM49B        | GNS          |
| AK2          | ATP5A1          | CAPN2         | COL6A1       | DNASE2             | <b>FASN</b>   | GOT1         |
| AKR1A1       | ATP5B           | <b>CAPNS1</b> | COL6A2       | DNPH1              | FAT1          | GOT2         |
| AKR1B1       | ATP6AP1         | CAPZA1        | COL6A2       | DPP3               | FBLN1         | <b>GP1BA</b> |
| AKR1C1       | ATP6AP2         | CAPZA2        | COL6A3       | DPP7               | FBLN1         | GPC1         |
| ALAD         | ATP6V1A         | CAPZB         | COL12A1      | DPYSL2             | FBLN5         | GPI          |
| ALCAM        | ATP6V1B2        | CAT           | COL18A1      | DSTN               | <b>FBP1</b>   | GRB2         |
| <b>ALDOA</b> | ATP6V1E1        | CBR1          | COMP         | DYNC1H1            | FERMT3        | GRN          |
| ALDOC        | ATP6V1F         | <b>CCT2</b>   | CORO1A       | ECH1               | FH            | <b>GSN</b>   |
| <b>ALPL</b>  | <b>ATP6V1G1</b> | <b>CCT3</b>   | CORO1B       | ECM1               | FKBP4         | GSR          |
| ALYREF       | <b>ATRN</b>     | CCT4          | COTL1        | EDIL3              | FKBP5         | <b>GSS</b>   |

|           |          |        |         |        |        |         |
|-----------|----------|--------|---------|--------|--------|---------|
| ANGPT1    | AXL      | CCT5   | CPE     | EEF1A1 | FLNA   | GSTO1   |
| ANGPTL2   | AZU1     | CCT6A  | CPQ     | EEF1G  | FLNB   | GSTP1   |
| ANP32B    | B2M      | CCT7   | CREG1   | EEF2   | FLRT2  | GAA     |
| ANPEP     | B4GALT1  | CCT8   | CRK     | EFEMP1 | FN1    | H2AFV   |
| ANXA1     | B4GAT1   | CD14   | CRYZ    | EFEMP2 | FN1    | H2AFY   |
| ANXA2     | BASP1    | CD248  | CSE1L   | EHD1   | FN1    | H3F3A   |
| ANXA5     | BAX      | CD44   | CSPG4   | EHD2   | FSCN1  | HBA1    |
| ANXA6     | BGN      | CD59   | CSRP1   | EIF2S1 | FSTL1  | HBB     |
| APEH      | BLMH     | CD81   | CST3    | EIF2S3 | FUCA1  | HDGF    |
| APLP2     | BLVRB    | CDC37  | CST6    | EIF3H  | FUCA2  | HDHD2   |
| HEBP1     | IGFBP7   | MTAP   | PCNA    | PROCR  | PROCR  | RHOA    |
| HEBP2     | ILF3     | MVP    | PCOLCE  | PROS1  | PROS1  | RHOG    |
| HEXA      | IMPDH2   | MXRA5  | PDCD6IP | PRSS23 | PRSS23 | RNASET2 |
| HEXB      | IQGAP1   | MXRA8  | PDIA3   | PRTN3  | PRTN3  | RNH1    |
| HINT1     | IQGAP2   | MYH14  | PDIA6   | PSAP   | PSAP   | RNPEP   |
| HIST1H2AC | ISLR     | MYH9   | PDXK    | PSAT1  | PSAT1  | RP2     |
| HIST1H2AJ | ITGAM    | MYL12A | PEBP1   | PSMA1  | PSMA1  | RPE     |
| HIST1H2BM | ITGB1    | MYL6   | PEPD    | PSMA2  | PSMA2  | RPL10A  |
| HIST1H3A  | ITGB2    | MYO1G  | PFAS    | PSMA3  | PSMA3  | RPL12   |
| HIST1H4A  | ITM2B    | MYOF   | PFKP    | PSMA4  | PSMA4  | RPL23   |
| HIST2H2AC | KPNB1    | NACA   | PFN1    | PSMA5  | PSMA5  | RPL23A  |
| HIST2H2BE | KRT6B    | NAGK   | PFN2    | PSMA6  | PSMA6  | RPL3    |
| HIST2H3A  | LAMA4    | NAGLU  | PGAM1   | PSMA7  | PSMA7  | RPL30   |
| HLA-DRA   | LAMB1    | NAMPT  | PGD     | PSMB1  | PSMB1  | RPL4    |
| HMCN1     | LAMB2    | NANS   | PGK1    | PSMB2  | PSMB2  | RPL5    |
| HNMT      | LAMC1    | NAPA   | PGLS    | PSMB3  | PSMB3  | RPLP0   |
| HNRNPA1   | LAMP1    | NAPRT  | PGM1    | PSMB4  | PSMB4  | RPLP2   |
| HNRNPA2B1 | LAMP2    | NARS   | PGM2    | PSMB5  | PSMB5  | RPSA    |
| HNRNPC    | LAMTOR3  | NCL    | PHB     | PSMB6  | PSMB6  | RPS2    |
| HNRNPD    | LCP1     | NEDD8  | PHPT1   | PSMB8  | PSMB8  | RPS3    |
| HNRNPK    | LDHA     | NID1   | PKM     | PSMB9  | PSMB9  | RPS3A   |
| HNRNPL    | LDHB     | NID2   | PLAU    | PSMD2  | PSMD2  | RPS4X   |
| HNRNPM    | LEPRE1   | NIT2   | PLBD2   | PSME1  | PSME1  | RPS5    |
| HNRNPR    | LGALS1   | NME1   | PLEC    | PSME2  | PSME2  | RPS8    |
| HP        | LGALS3   | NME2   | PLOD1   | PTBP1  | PTBP1  | RPS11   |
| HPRT1     | LGALS3BP | NPC2   | PLOD2   | PTGDS  | PTGDS  | RPS13   |
| HPX       | LGMN     | NPEPPS | PLOD3   | PTPN6  | PTPN6  | RPS14   |
| HSP90AB1  | LMAN2    | NQO2   | PLXNA1  | PTPRC  | PTPRC  | RPS15A  |
| HSP90AB2P | LRRC15   | NT5E   | PLXNB2  | PTPRG  | PTPRG  | RPS18   |
| HSP90B1   | LSP1     | NUCB1  | PLAA    | PXDN   | PXDN   | RPS19   |
| HSP90AA1  | LTA4H    | NUCB2  | PNP     | PYGB   | PYGB   | RPS20   |
| HSPA1B    | LTBP2    | NUDT5  | PPA1    | PYGL   | PYGL   | RPS26   |
| HSPA4     | LTBP3    | NUMA1  | PPIA    | QPCT   | QPCT   | RPS27A  |
| HSPA5     | LTF      | NUTF2  | PPIB    | QSOX1  | QSOX1  | RPS28   |
| HSPA6     | LUM      | OGN    | PPIC    | RAB10  | RAB1A  | RSU1    |
| HSPA8     | LYPLA2   | OMD    | PPP1CA  | RAB11A | RAB1B  | RUVBL1  |
| HSPA9     | LYZ      | OTUB1  | PPP1R7  | RAB11B | RAB2A  | RUVBL2  |
| HSPB1     | MAN1A1   | P4HB   | PPP2CA  | RAB14  | RAB5C  | S100A4  |

|          |         |          |         |       |        |         |
|----------|---------|----------|---------|-------|--------|---------|
| HSPD1    | MAN2B1  | PA2G4    | PPP2R1A | RAB1A | RAB6A  | S100A6  |
| HSPE1    | MARCKS  | PABPC1   | PPT1    | RAB1B | RAB7A  | S100A9  |
| HSPG2    | MDH1    | PABPN1   | PRCP    | RAB2A | RAB8B  | S100A10 |
| HSPH1    | MDH2    | PAFAH1B1 | PRDX1   | RAB5C | RAB10  | S100A11 |
| HTRA1    | MFGE8   | PAFAH1B2 | PRDX2   | RAB6A | RAB11A | S100P   |
| IDH1     | MGP     | PAICS    | PRDX4   | RAB7A | RAB11B | SARS    |
| IDH2     | MIF     | PAM      | PRDX5   | RAB8B | RAB14  | SBSN    |
| IGF2R    | MMP9    | PARK7    | PRDX6   | RAN   | RAN    | SCN11A  |
| IGFALS   | MPO     | PCBP1    | PRELP   | RBMX  | RBMX   | SCPEP1  |
| IGFBP2   | MSN     | PCMT1    | PRNP    | RDX   | RDX    | SDC1    |
| SDC4     | TF      | VTA1     |         |       |        |         |
| SDCBP    | TGFBI   | WARS     |         |       |        |         |
| SDF4     | TGM2    | WDR1     |         |       |        |         |
| SEC13    | THBS1   | WNT5B    |         |       |        |         |
| SELENBP1 | THBS4   | YBX1     |         |       |        |         |
| SEMA3C   | THRAP3  | YWHAB    |         |       |        |         |
| SEPP1    | THY1    | YWHAE    |         |       |        |         |
| SEPT2    | TIMP1   | YWHAG    |         |       |        |         |
| SEPT7    | TKT     | YWHAH    |         |       |        |         |
| SERBP1   | TLN1    | YWHAQ    |         |       |        |         |
| SERPINB1 | TPI1    | YWHAZ    |         |       |        |         |
| SERPINB6 | TPM3    |          |         |       |        |         |
| SERPINB8 | TPM3    |          |         |       |        |         |
| SERPINE1 | TPM4    |          |         |       |        |         |
| SERPINF1 | TPM4    |          |         |       |        |         |
| SERPING1 | TPP1    |          |         |       |        |         |
| SH3BGRL  | TPT1    |          |         |       |        |         |
| SH3BGRL3 | TSTA3   |          |         |       |        |         |
| SIRPA    | TTN     |          |         |       |        |         |
| SLC1A5   | TUBB    |          |         |       |        |         |
| SLC2A1   | TUBB3   |          |         |       |        |         |
| SLC3A2   | TUBB4B  |          |         |       |        |         |
| SLC4A1   | TUBB8   |          |         |       |        |         |
| SLC9A3R1 | TUFM    |          |         |       |        |         |
| SMS      | TWF2    |          |         |       |        |         |
| SND1     | TXN     |          |         |       |        |         |
| SNRPD2   | TXNDC5  |          |         |       |        |         |
| SOD1     | TXNDC17 |          |         |       |        |         |
| SOD3     | TXNRD1  |          |         |       |        |         |
| SORD     | TXNRD1  |          |         |       |        |         |
| SPON2    | UBA1    |          |         |       |        |         |
| SPP1     | UBE2D2  |          |         |       |        |         |
| SPP1     | UBE2I   |          |         |       |        |         |
| SPTAN1   | UBE2N   |          |         |       |        |         |
| SPTBN1   | UBE2V1  |          |         |       |        |         |
| SRPR     | UGGT1   |          |         |       |        |         |
| SRSF7    | UGP2    |          |         |       |        |         |
| ST13     | USP14   |          |         |       |        |         |

|         |       |
|---------|-------|
| STAU1   | VAMP8 |
| STMN1   | VASN  |
| STX7    | VASP  |
| SUB1    | VAT1  |
| SUMO2   | VCAM1 |
| SYNCRIP | VCL   |
| TAGLN2  | VCP   |
| TALDO1  | VIM   |
| TARS    | VPS35 |
| TCP1    | VPS4B |

**Table S14.** Expression of proteins included in the GO term proteases by human MSCs and osteoblasts. The proteins are listed in alphabetic order based on their gene identity. Proteins only expressed by MSCs are colored in blue whereas proteins expressed only by osteoblasts are colored in green.

|           |        |          |        |           |
|-----------|--------|----------|--------|-----------|
| ADAM10    | COL7A1 | HBB      | PEBP1  | SERPINB2  |
| ADAM19    | COMP   | HGF      | PEPD   | SERPINB6  |
| ADAM9     | COPS4  | HMGB2    | PLAU   | SERPINB7  |
| ADAMTS1   | CPA4   | HP       | PRCP   | SERPINB8  |
| ADAMTS2   | CPE    | HTRA1    | PRDX4  | SERPINB10 |
| ADAMTS4   | CPQ    | INS-IGF2 | PRNP   | SERPINE1  |
| ANPEP     | CST3   | ITGAM    | PROS1  | SERPINE2  |
| ANXA2     | CST6   | ITGB1    | PRSS23 | SERPINF1  |
| APEX1     | CSTB   | ITM2B    | PRTN3  | SERPING1  |
| APLP2     | CTSA   | LDLR     | PSAP   | SET       |
| APP       | CTSB   | LFNG     | PSMA1  | SET       |
| ARF1;ARF3 | CTSC   | LGMN     | PSMA2  | SRGN      |
| ARSA      | CTSD   | LRP1     | PSMA3  | STAT1     |
| ATP5A1    | CTSF   | LTA4H    | PSMA4  | SUMO1     |
| ATP5B     | CTSG   | LTF      | PSMA5  | SUMO2     |
| ATP6AP2   | CTSK   | MBTPS1   | PSMA6  | TFPI      |
| ATPIF1    | CTSL   | METAP2   | PSMA7  | TGFB1     |
| AZU1      | CTSS   | MIF      | PSMB1  | TIMP1     |
| BIN1      | CTSZ   | MMP1     | PSMB2  | TIMP2     |
| BLMH      | DCD    | MMP2     | PSMB3  | TPP1      |
| BMP1      | DDI2   | MMP11    | PSMB4  | TPP2      |
| C1QBP     | DLD    | MMP14    | PSMB5  | TRIM28    |
| C1R       | DLST   | MMP8     | PSMB6  | TTN       |
| C1S       | DPP3   | MMP9     | PSMB7  | TXN2      |
| C2        | DPP7   | MRC2     | PSMB8  | UBXN1     |
| CAPN1     | ECM1   | MYDGF    | PSMB9  | UCHL1     |
| CAPN2     | EIF4G1 | NARS     | PSMB10 | UCHL3     |
| CAPNS1    | ELANE  | NEDD8    | PSMC4  | USP14     |
| CASP3     | ERAP1  | NPEPPS   | PSMD2  | USP15     |
| CAST      | F10    | NPM1     | PSMD4  | USP48     |
| CD109     | FAP    | OS9      | PSME1  | USP5      |
| CFB       | FLNC   | OTUB1    | PSME2  | VCP       |
| CFD       | FN1    | P4HB     | PSME3  | VPS26A    |

|        |       |        |           |      |
|--------|-------|--------|-----------|------|
| CFH    | FN1   | PAMR1  | PYCARD    | YBX1 |
| CFI    | FN1   | PAPPA  | RAD23A    |      |
| CLTC   | G3BP1 | PARK7  | RHOA;RHOC |      |
| CNDP2  | G3BP2 | PCOLCE | RNPEP     |      |
| COL1A1 | GAPDH | PCSK5  | SART3     |      |
| COL1A2 | GRN   | PDGFRB | SCPEP1    |      |
| COL3A1 | HABP2 | PDIA3  | SERPINA9  |      |
| COL6A3 | HBA1  | PDIA6  | SERPINB1  |      |

---

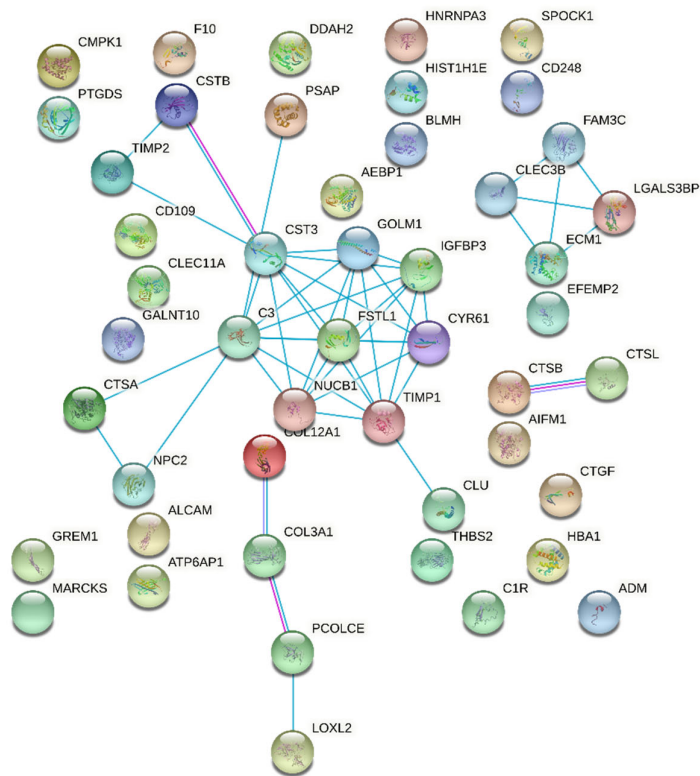

**Figure S1.** Network analysis of proteins released by osteoblasts derived from healthy donors and showing significant differences when comparing male and female donors. See Table s14 for additional information (p-values, fold change, increased/decreased in female donors).
